# Supplementary material for: Efficient preparation of 9-aryl-1,8-dioxo-octahydroxanthenes catalyzed by nano-TiO2with high recyclability
Source: Royal Society of Chemistry journal article supplement (doi:10.1039/c2ra22595f), 2012-11-21

## Electronic Supplementary Information

### Efficient Preparation of 9-Aryl-1,8-dioxo-octahydroxanthenes Catalyzed by Nano-TiO<sub>2</sub> with High Recyclability

Ardeshir Khazaei,<sup>a,\*</sup> Ahmad Reza Moosavi-Zare,<sup>a,\*</sup> Zahra Mohammadi,<sup>a</sup> Abdolkarim Zare,<sup>b</sup> Vahid  
Khakyzadeh,<sup>a</sup> and Ghasem Darvishi<sup>c</sup>

<sup>a</sup>*Faculty of Chemistry, Bu-Ali Sina University, Hamedan, 6517838683, Iran*

<sup>b</sup>*Department of Chemistry, Payame Noor University, PO BOX 19395-3697 Tehran, Iran*

<sup>c</sup>*Department of Chemistry, Faculty of Science, Arak University, Arak 38156-879, Iran*

Corresponding author. E-mail: [moosavizare@yahoo.com](mailto:moosavizare@yahoo.com) or [Khzaei\\_1326@yahoo.com](mailto:Khzaei_1326@yahoo.com)

#### Table of Contents

|                                                                                 |   |
|---------------------------------------------------------------------------------|---|
| General methods .....                                                           | 2 |
| General procedure for the synthesis of 9-aryl-1,8-dioxo-octahydroxanthenes..... | 2 |
| Data of compounds.....                                                          | 3 |
| NMR spectra of compounds.....                                                   | 7 |

**General methods.** All chemicals were purchased from Merck or Fluka Chemical Companies. All known compounds were identified by comparison of their melting points and spectral data with those reported in the literature. Nano-TiO<sub>2</sub> was prepared according to the reported procedure.<sup>36</sup> Progress of the reactions was monitored by thin layer chromatography (TLC) using silica gel SIL G/UV 254 plates. The melting points were recorded on a Büchi B-545 apparatus in open capillary tubes. The <sup>1</sup>H NMR (300 or 400 MHz) and <sup>13</sup>C NMR (75 or 100) were run on a Bruker Avance DPX, FT-NMR spectrometers,  $\delta$  in ppm. Mass spectra were obtained with Shimadzu GC-MS-QP 1100 EX model.

### **General procedure for the synthesis of 9-aryl-1,8-dioxo-octahydroxanthenes**

A mixture of dimedone (0.28 g, 2 mmol), arylaldehyde (1 mmol) and nano-TiO<sub>2</sub> (0.1 mmol, 10 mol%) in a test tube was firstly stirred magnetically. After solidification of the reaction mixture with a small rod at 100 °C and completion the reaction monitored by TLC, the mixture was cooled to room temperature and warm EtOH (30 mL) was added to it. Then the reaction mixture was concentrated to 10 mL and centrifuged for 20 min to separate the Nano-TiO<sub>2</sub>. After evaporation of the solvent from the supernatant, the resulting solid was recrystallized from EtOH (95%) to give the pure product. EtOAc (10 mL) was added to the recycled Nano-TiO<sub>2</sub> and centrifuged (two times). Finally, the Nano-TiO<sub>2</sub> was dried and reused for the next run.

## Spectral data and original spectrums of the products

### 3,3,6,6-Tetramethyl-9-phenyl-1,8-dioxo-octahydroxanthene (1a)

$^1\text{H}$  NMR (500 MHz, DMSO- $d_6$ ):  $\delta$  (ppm) 0.90 (s, 6H), 1.04 (s, 6H), 2.09 (d,  $J = 16.1$  Hz, 2H), 2.27 (d,  $J = 16.2$  Hz, 2H), 2.53 (d,  $J = 17.1$  Hz, 2H), 2.58 (d,  $J = 17.7$  Hz, 2H), 4.53 (s, 1H), 7.10 (t,  $J = 7.0$  Hz, 1H), 7.18 (d,  $J = 7.0$  Hz, 2H), 7.21 (t,  $J = 7.20$  Hz, 2H);  $^{13}\text{C}$  NMR (75 MHz,  $\text{CDCl}_3$ ):  $\delta$  (ppm) 27.3, 29.3, 31.8, 32.2, 40.9, 50.7, 115.6, 126.4, 128.0, 128.4, 144.1, 162.3, 196.4. Anal. calcd. for  $\text{C}_{23}\text{H}_{26}\text{O}_3$ : C 78.83, H 7.48; found: C 78.60, H 7.57.

### 3,3,6,6-Tetramethyl-9-(4-methoxyphenyl)-1,8-dioxo-octahydroxanthene (1b)

$^1\text{H}$  NMR (400 MHz,  $\text{CDCl}_3$ ):  $\delta$  (ppm) 1.01 (s, 6H), 1.12 (s, 6H), 2.18 (d,  $J = 16.4$  Hz, 2H), 2.25 (d,  $J = 16.4$  Hz, 2H), 2.48 (s, 4H), 3.75 (s, 3H), 4.72 (s, 1H), 6.77 (d,  $J = 8.8$  Hz, 2H), 7.22 (d,  $J = 8.8$  Hz, 2H);  $^{13}\text{C}$  NMR (100 MHz,  $\text{CDCl}_3$ ):  $\delta$  (ppm) 27.3, 29.3, 30.9, 32.2, 40.9, 50.8, 55.1, 113.5, 115.8, 129.3, 136.5, 157.9, 162.1, 196.5. Anal. calcd. for  $\text{C}_{24}\text{H}_{28}\text{O}_4$ : C 75.76, H 7.42; found: C 75.94, H 7.31.

### 3,3,6,6-Tetramethyl-9-(3-methoxyphenyl)-1,8-dioxo-octahydroxanthene (1c)

$^1\text{H}$  NMR (400 MHz,  $\text{CDCl}_3$ ):  $\delta$  (ppm) 1.02 (s, 6H), 1.11 (s, 6H), 2.16-2.26 (Distorted AB system, 4H), 2.48 (s, 4H), 3.77 (s, 3H), 6.66 (dd,  $J = 1.6, 7.2$  Hz, 1H), 6.88-6.90 (m, 2H), 7.13 (t,  $J = 7.6$  Hz, 1H);  $^{13}\text{C}$  NMR (400 MHz,  $\text{CDCl}_3$ ):  $\delta$  (ppm) 27.4, 29.2, 31.8, 32.2, 40.9, 50.8, 55.13, 111.8, 114.3, 115.5, 120.9, 128.9, 145.7, 159.3, 162.3, 196.4. Anal. calcd. for  $\text{C}_{24}\text{H}_{28}\text{O}_4$ : C 75.76, H 7.42; found: C 75.98, H 7.54.

### 3,3,6,6-Tetramethyl-9-(3,4-dimethoxyphenyl)-1,8-dioxo-octahydroxanthene (1d)

$^1\text{H}$  NMR (500 MHz, DMSO- $d_6$ ):  $\delta$  (ppm) 0.92 (s, 6H), 1.04 (s, 6H), 2.10 (d,  $J = 16.1$  Hz, 2H), 2.27 (d,  $J = 16.1$  Hz, 2H), 2.51 (d,  $J = 17.6$  Hz, 2H), 2.57 (d,  $J = 17.4$  Hz, 2H), 3.68 (s, 6H), 4.48 (s, 1H), 6.67 (dd,  $J = 8.3, 1.9$  Hz, 1H), 6.72 (d,  $J = 1.9$  Hz, 1H), 6.80 (d,  $J = 8.3$  Hz, 1H);  $^{13}\text{C}$  NMR (125 MHz, DMSO- $d_6$ ):  $\delta$  (ppm) 27.2, 29.6, 31.4, 32.7, 50.9, 56.3, 56.3, 112.2, 112.9, 115.4, 120.9, 137.7, 148.1, 148.9, 163.6, 196.9. Anal. calcd. for  $\text{C}_{25}\text{H}_{30}\text{O}_5$ : C 73.15, H 7.37; found: C 72.96, H 7.47.

### 3,3,6,6-Tetramethyl-9-(3,4,5-trimethoxyphenyl)-1,8-dioxo-octahydroxanthene (1e)

<sup>1</sup>H NMR (500 MHz, DMSO-d<sub>6</sub>): δ (ppm) 0.96 (s, 6H), 1.05 (s, 6H), 2.14 (d, *J* = 16.2 Hz, 2H), 2.29 (d, *J* = 16.2 Hz, 2H), 2.50-2.54 (Distorted AB system, 4H), 3.32 (s, 3H), 3.60 (s, 3H), 3.69 (s, 3H), 4.50 (s, 1H), 6.42 (s, 2H); <sup>13</sup>C NMR (75 MHz, CDCl<sub>3</sub>): δ (ppm) 27.2, 29.4, 31.8, 32.2, 40.9, 50.7, 56.1, 60.7, 105.6, 115.5, 136.5, 139.7, 152.8, 162.4, 196.5. Anal. calcd. for C<sub>26</sub>H<sub>32</sub>O<sub>6</sub>: C 70.89, H 7.32; found: C 70.68, H 7.40.

### **3,3,6,6-Tetramethyl-9-(4-benzyloxyphenyl)-1,8-dioxo-octahydroxanthene (1f)**

<sup>1</sup>H NMR (300 MHz, DMSO-d<sub>6</sub>): δ (ppm) 1.01 (s, 6H), 1.09 (s, 6H), 2.13-2.27 (m, 4H), 2.45 (s, 4H), 4.69 (s, 1H), 4.82 (s, 2H), 6.80 (d, *J* = 8.7 Hz, 2H), 7.22 (d, *J* = 8.7 Hz, 2H), 7.29-7.43 (m, 5H); <sup>13</sup>C NMR (75 MHz, DMSO-d<sub>6</sub>): δ (ppm) 27.2, 29.4, 31.8, 32.2, 40.9, 50.7, 69.0, 114.8, 115.6, 126.9, 127.3, 128.4, 129.3, 136.5, 139.7, 152.8, 162.4, 196.5. Anal. calcd. for C<sub>30</sub>H<sub>32</sub>O<sub>4</sub>: C 78.92, H 7.06; found: C 78.68, H 7.19.

### **3,3,6,6-Tetramethyl-9-(4-methylphenyl)-1,8-dioxo-octahydroxanthene (1g)**

<sup>1</sup>H NMR (500 MHz, CDCl<sub>3</sub>): δ (ppm) 1.02 (s, 6H), 1.25 (s, 6H), 2.17-2.27 (m, 7H), 2.49 (s, 4H), 4.74 (s, 1H), 7.04 (d, *J* = 7.5 Hz, 2H), 7.20 (d, *J* = 6.9 Hz, 2H); <sup>13</sup>C NMR (125 MHz, CDCl<sub>3</sub>): δ (ppm) 21.5, 27.8, 29.7, 31.9, 32.6, 41.3, 51.2, 116.2, 128.7, 129.2, 136.1, 141.6, 162.5, 196.8. Anal. calcd. for C<sub>24</sub>H<sub>28</sub>O<sub>3</sub>: C 79.09, H 7.74; found: C 79.27, H 7.66.

### **3,3,6,6-Tetramethyl-9-(4-hydroxyphenyl)-1,8-dioxo-octahydroxanthene (1h)**

<sup>1</sup>H NMR (300 MHz, CDCl<sub>3</sub>): δ (ppm) 0.97 (s, 6H), 1.07 (s, 6H), 2.09-2.25 (m, 4H), 2.44 (s, 4H), 4.64 (s, 1H), 6.51 (d, *J* = 7.4 Hz, 2H), 7.04 (d, *J* = 7.4 Hz, 2H), 7.17 (s, 1H); <sup>13</sup>C NMR (75 MHz, CDCl<sub>3</sub>): δ (ppm) 27.4, 29.2, 30.9, 32.3, 40.8, 50.7, 115.3, 115.9, 129.3, 135.4, 154.8, 162.5, 197.4. Anal. calcd. for C<sub>23</sub>H<sub>26</sub>O<sub>4</sub>: C 75.38, H 7.15; found: C 75.61, H 7.25.

### **3,3,6,6-Tetramethyl-9(5-bromo-2-hydroxyphenyl)-1,8-dioxo-octahydroxanthene (1i)**

<sup>1</sup>H NMR (500 MHz, DMSO-d<sub>6</sub>): δ (ppm) 0.90 (s, 6H), 0.97 (s, 3H), 1.05 (s, 3H), 2.04 (d, *J* = 15.8 Hz, 2H), 2.25 (d, *J* = 15.9 Hz, 2H), 2.34 (d, *J* = 17.3 Hz, 2H), 2.55 (d, *J* = 17.4 Hz, 2H), 5.04 (s, 1H), 6.95 (d, *J* = 8.64 Hz, 1H), 7.04 (s, 1H), 7.28 (d, *J* = 8.60 Hz, 1H), 10.59 (s, 1H); <sup>13</sup>C NMR (125 MHz, DMSO-d<sub>6</sub>): δ (ppm) 26.9, 28.4, 30.0, 32.5, 51.2, 100.4, 111.3, 116.3, 118.6, 129.1, 130.6, 131.4, 149.8, 165.3, 196.5. Anal. calcd. for C<sub>23</sub>H<sub>25</sub>BrO<sub>4</sub>: C 62.03, H 5.66; found: C 61.84, H 5.54.

**3,3,6,6-Tetramethyl-9-(4-bromophenyl)-1,8-dioxo-octahydroxanthene (1j)**

<sup>1</sup>H NMR (500 MHz, DMSO-d<sub>6</sub>): δ (ppm) 0.91 (s, 6H), 1.04 (s, 6H), 2.07 (d, *J* = 16.1 Hz, 2H), 2.25 (d, *J* = 16.1 Hz, 2H), 2.50-2.59 (Distorted AB system, 4H), 4.49 (s, 1H), 7.13 (d, *J* = 8.4 Hz, 2H), 7.42 (d, *J* = 8.4 Hz, 2H); <sup>13</sup>C NMR (75 MHz, CDCl<sub>3</sub>): δ (ppm) 27.3, 29.3, 31.5, 32.2, 40.8, 50.7, 115.1, 120.2, 130.2, 131.1, 143.3, 162.5, 196.4. Anal. calcd. for C<sub>23</sub>H<sub>25</sub>BrO<sub>3</sub>: C 64.34, H 5.87; found: C 64.50, H 5.76.

**3,3,6,6-Tetramethyl-9-(4-chlorophenyl)-1,8-dioxo-octahydroxanthene (1k)**

<sup>1</sup>H NMR (500 MHz, DMSO-d<sub>6</sub>): δ (ppm) 0.90 (s, 6H), 1.04 (s, 6H), 2.09 (d, *J* = 16.1 Hz, 2H), 2.27 (d, *J* = 16.1 Hz, 2H), 2.52 (d, 2H), 2.57 (d, *J* = 17.6 Hz, 2H), 4.51 (s, 1H), 7.19 (d, *J* = 8.3 Hz, 2H), 7.29 (d, *J* = 8.2 Hz, 2H); <sup>13</sup>C NMR (75 MHz, CDCl<sub>3</sub>): δ (ppm) 27.3, 29.3, 31.5, 32.2, 40.8, 50.7, 115.2, 128.2, 129.8.2, 131.9, 142.8, 162.5, 196.4. Anal. calcd. for C<sub>23</sub>H<sub>25</sub>ClO<sub>3</sub>: C 71.77, H 6.55; found: C 71.92, H 6.63.

**3,3,6,6-Tetramethyl-9-(3-chlorophenyl)-1,8-dioxo-octahydroxanthene (1l)**

<sup>1</sup>H NMR (500 MHz, CDCl<sub>3</sub>): δ (ppm) 1.02 (s, 6H), 1.12 (s, 6H), 2.18-2.27 (Distorted AB system, 4H), 2.52 (t, *J* = 14.0 Hz, 4H), 4.74 (s, 1H), 7.09 (d, *J* = 7.6 Hz, 1H), 7.16 (t, *J* = 7.9 Hz, 2H), 7.25 (s, 1H); <sup>13</sup>C NMR (125 MHz, CDCl<sub>3</sub>): δ (ppm) 27.8, 29.6, 32.2, 32.6, 41.2, 51.1, 115.5, 127.0, 127.4, 128.8, 129.6, 134.3, 146.6, 163.1, 196.7. Anal. calcd. for C<sub>23</sub>H<sub>25</sub>ClO<sub>3</sub>: C 71.77, H 6.55; found: C 71.56, H 6.43.

**3,3,6,6-Tetramethyl-9-(2-chlorophenyl)-1,8-dioxo-octahydroxanthene (1m)**

<sup>1</sup>H NMR (500 MHz, DMSO-d<sub>6</sub>): δ (ppm) 0.88 (s, 6H), 1.04 (s, 6H), 2.02 (d, *J* = 16.1 Hz, 2H), 2.26 (d, *J* = 16.0 Hz, 2H), 2.43-2.60 (m, 4H), 4.82 (s, 1H), 7.12 (t, *J* = 7.1 Hz, 1H), 7.19-7.27 (m, 3H); <sup>13</sup>C NMR (75 MHz, CDCl<sub>3</sub>): δ (ppm) 27.3, 29.3, 31.8, 32.0, 40.8, 50.7, 113.7, 126.3, 127.8, 130.1, 132.9, 133.4, 139.9, 163.0, 196.5. Anal. calcd. for C<sub>23</sub>H<sub>25</sub>ClO<sub>3</sub>: C 71.77, H 6.55; found: C 71.52, H 6.68.

**3,3,6,6-Tetramethyl-9-(4-nitrophenyl)-1,8-dioxo-octahydroxanthene (1n)**

<sup>1</sup>H NMR (500 MHz, CDCl<sub>3</sub>): δ (ppm) 0.99 (s, 6H), 1.12 (s, 6H), 2.16 (d, *J* = 16.3 Hz, 2H), 2.26 (d, *J* = 16.3 Hz, 2H), 2.51 (t, *J* = 18.7 Hz, 4H), 4.83 (s, 1H), 7.48 (d, *J* = 8.2 Hz, 2H), 8.08 (2H, *J* = 8.2 Hz, 2H); <sup>13</sup>C NMR (125 MHz, CDCl<sub>3</sub>): δ (ppm) 27.7, 29.6, 32.6, 32.8, 41.2, 51.0, 114.9, 123.8, 129.8, 146.8, 152.0, 163.5, 196.7. Anal. calcd. for C<sub>23</sub>H<sub>25</sub>NO<sub>5</sub>: C 69.86, H 6.37, N 3.54; found: C 69.73, H 6.28, N 3.61.

**3,3,6,6-Tetramethyl-9-(3-nitrophenyl)-1,8-dioxo-octahydroxanthene (1o)**

<sup>1</sup>H NMR (500 MHz, CDCl<sub>3</sub>): δ (ppm) 1.01 (s, 6H), 1.13 (s, 6H), 2.18 (d, *J* = 16.3 Hz, 2H), 2.27 (d, *J* = 16.3 Hz, 2H), 2.53 (t, *J* = 18.5 Hz, 4H), 4.85 (s, 1H), 7.41 (t, *J* = 7.9 Hz, 1H), 7.81 (d, *J* = 7.5 Hz, 1H), 7.99 (d, *J* = 8.2 Hz, 1H), 8.06 (s, 1H); <sup>13</sup>C NMR (125 MHz, CDCl<sub>3</sub>): δ (ppm) 27.7, 29.6, 32.5, 32.7, 41.2, 51.0, 114.9, 122.0, 123.1, 129.2, 136.0, 146.8, 148.7, 163.5, 196.8. Anal. calcd. for C<sub>23</sub>H<sub>25</sub>NO<sub>5</sub>: C 69.86, H 6.37, N 3.54; found: C 69.67, H 6.48, N 3.45.

**3,3,6,6-Tetramethyl-9-(4-cyanophenyl)-1,8-dioxo-octahydroxanthene (1p)**

<sup>1</sup>H NMR (400 MHz, CDCl<sub>3</sub>): δ (ppm) 0.99 (s, 6H), 1.13 (s, 6H), 2.17 (d, *J* = 16.4 Hz, 2H), 2.26 (d, *J* = 16.4 Hz, 2H), 2.52 (t, *J* = 15.4 Hz, 4H), 4.78 (s, 1H), 7.43 (d, *J* = 8.4 Hz, 2H), 7.53 (2H, *J* = 8.0 Hz, 2H); <sup>13</sup>C NMR (100 MHz, CDCl<sub>3</sub>): δ (ppm) 27.3, 29.2, 32.2, 32.4, 40.8, 50.6, 110.2, 114.6, 119.1, 129.3, 131.9, 149.5, 162.9, 196.3. Anal. calcd. for C<sub>24</sub>H<sub>25</sub>NO<sub>3</sub>: C 76.77, H 6.71, N 3.73; found: C 76.99, H 6.61, N 3.65.

### 3,3,6,6-Tetramethyl-9-phenyl-1,8-dioxo-octahydroxanthene (1a)

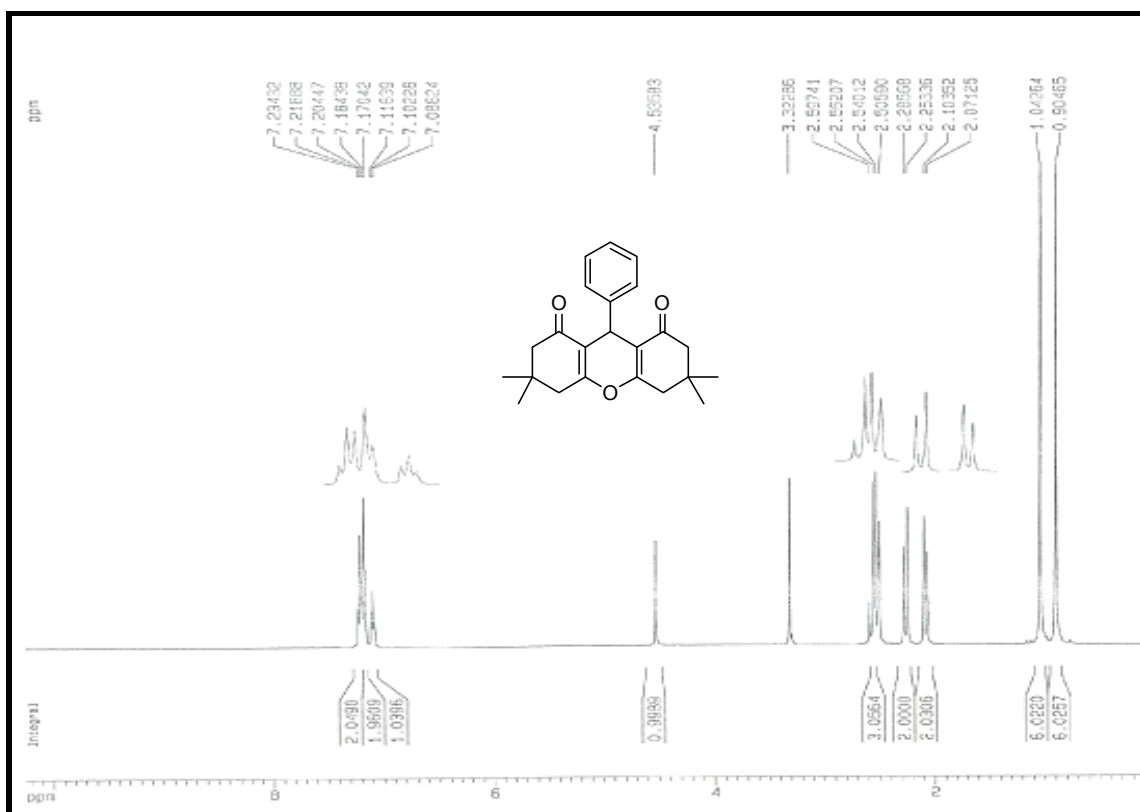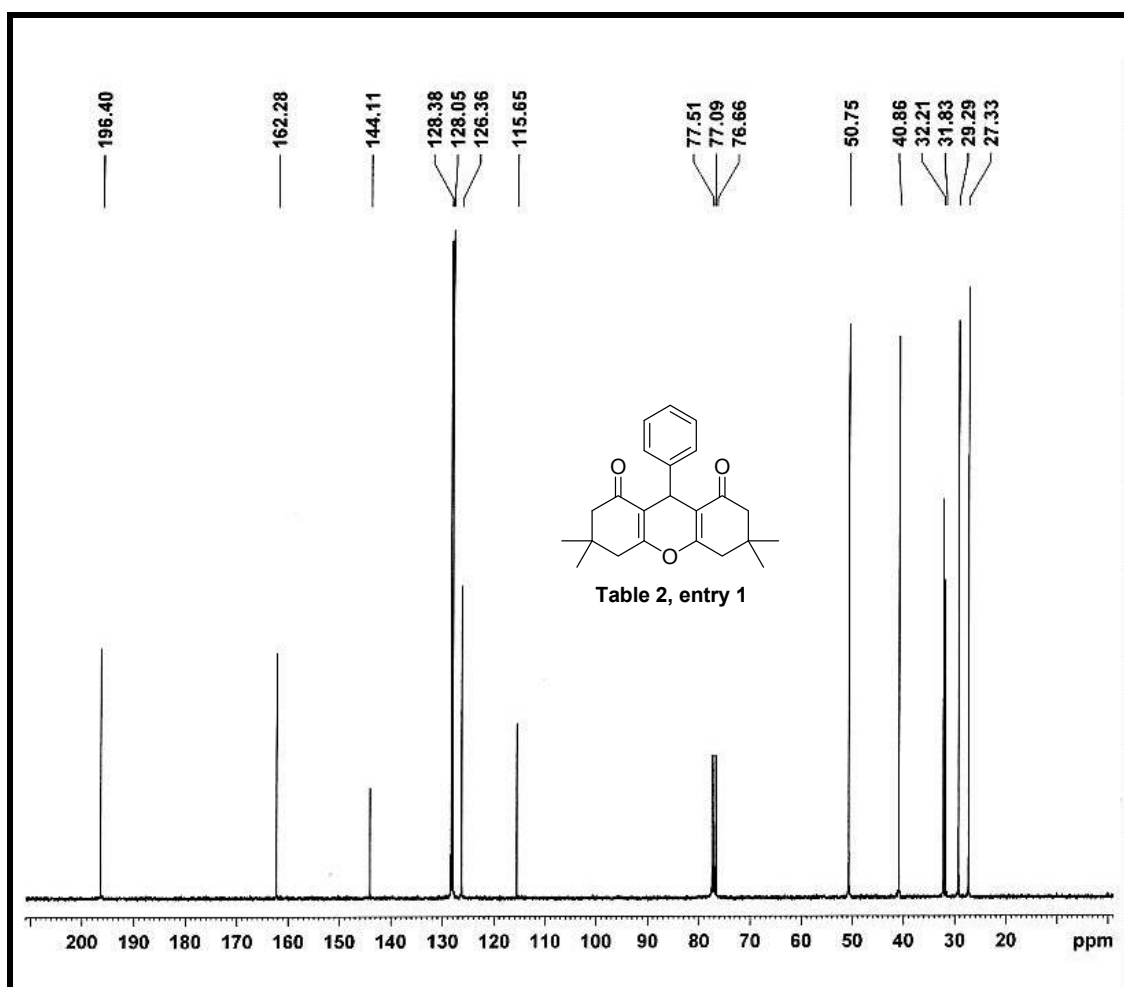

### 3,3,6,6-Tetramethyl-9-(4-methoxyphenyl)-1,8-dioxo-octahydroxanthene (1b)

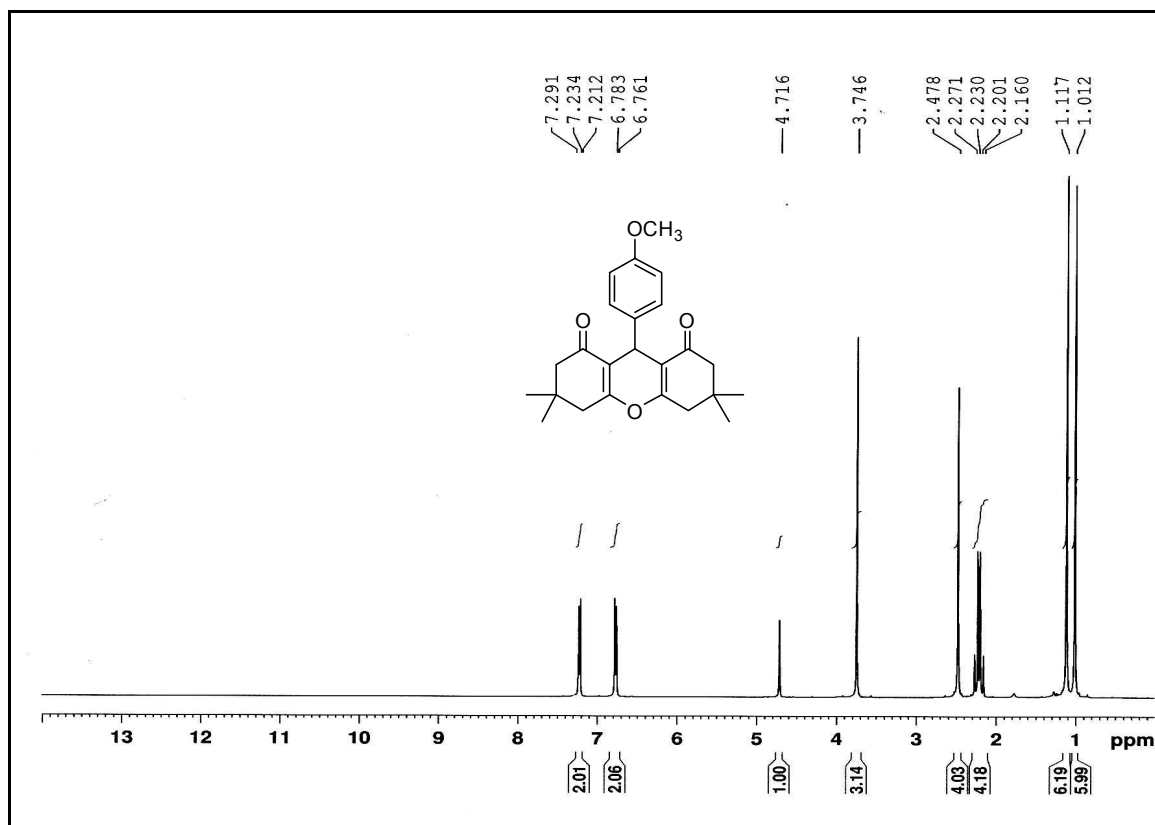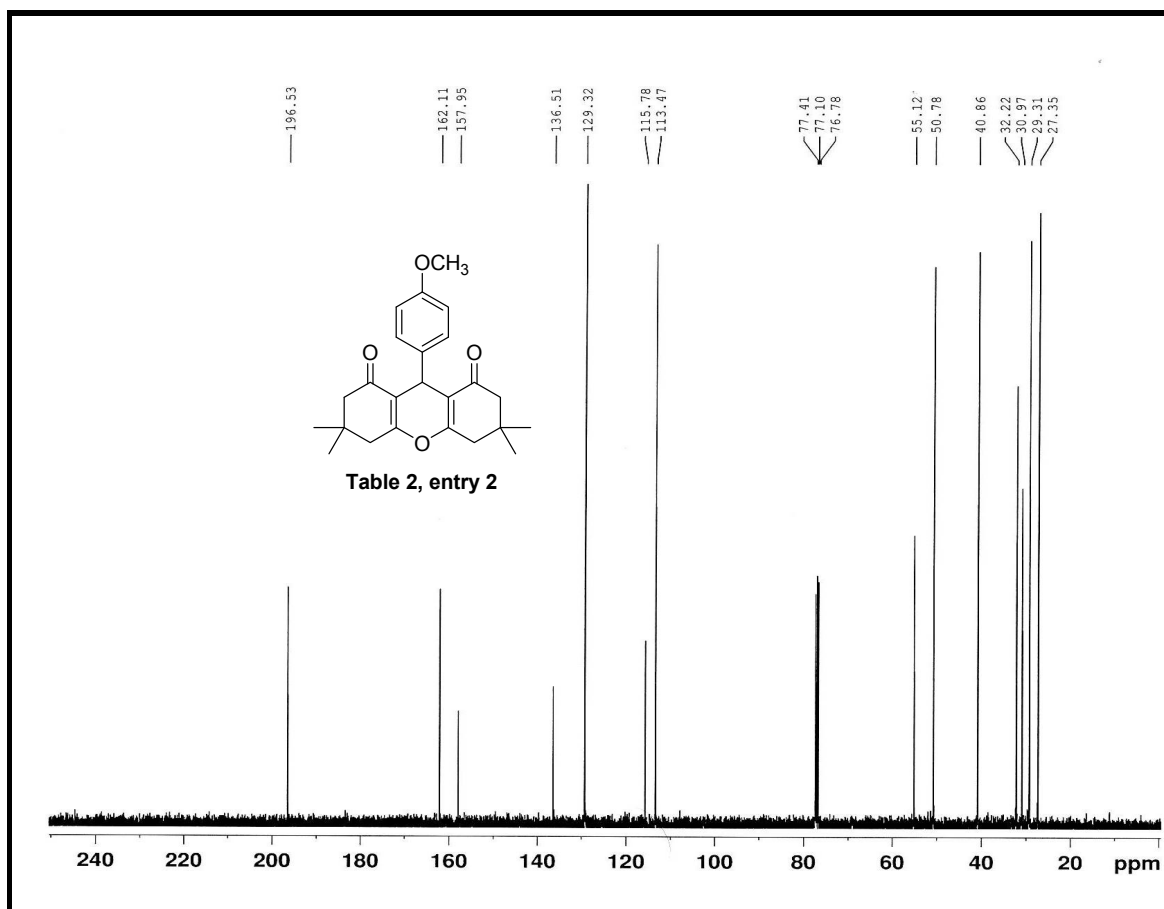



### 3,3,6,6-Tetramethyl-9-(3-methoxyphenyl)-1,8-dioxo-octahydroxanthene (1c)

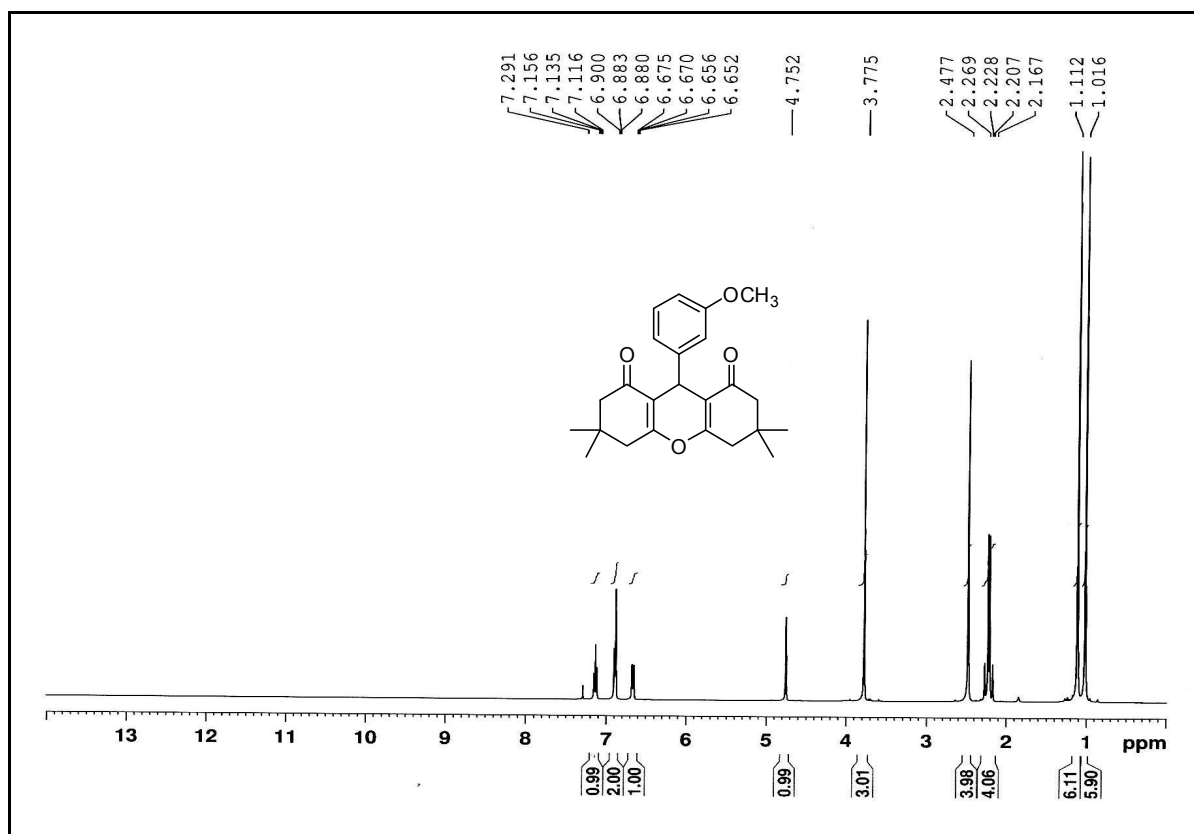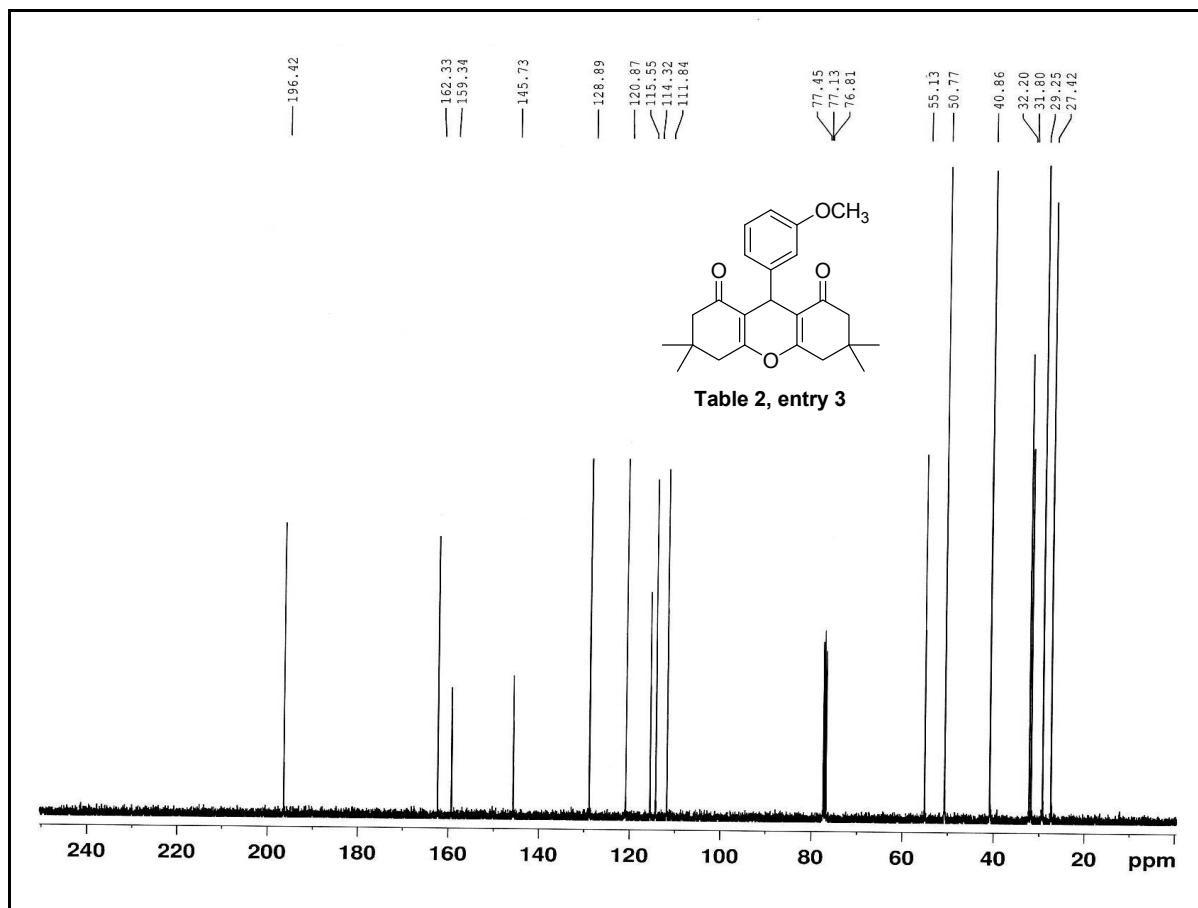

### 3,3,6,6-Tetramethyl-9-(3,4-dimethoxyphenyl)-1,8-dioxo-octahydroxanthene (1d)

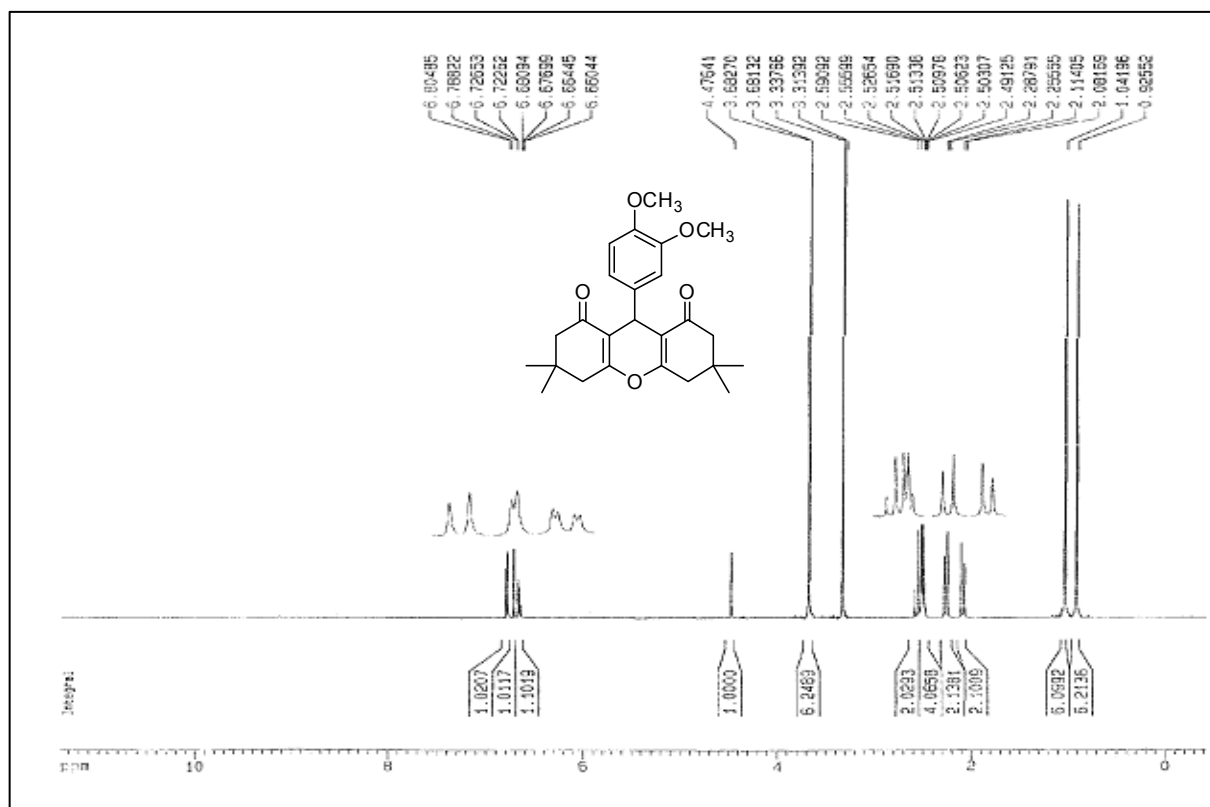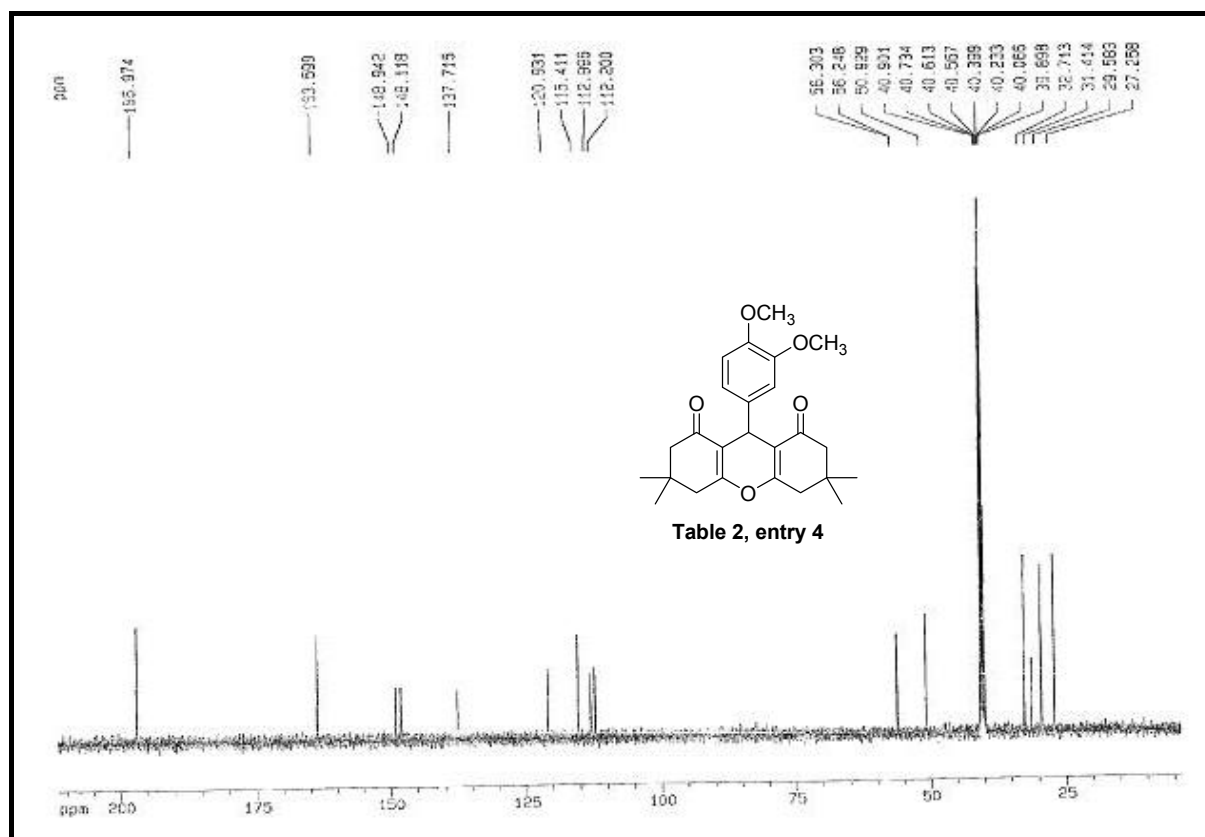

Table 2, entry 4

### 3,3,6,6-Tetramethyl-9-(3,4,5-trimethoxyphenyl)-1,8-dioxo-octahydroxanthene (1e)

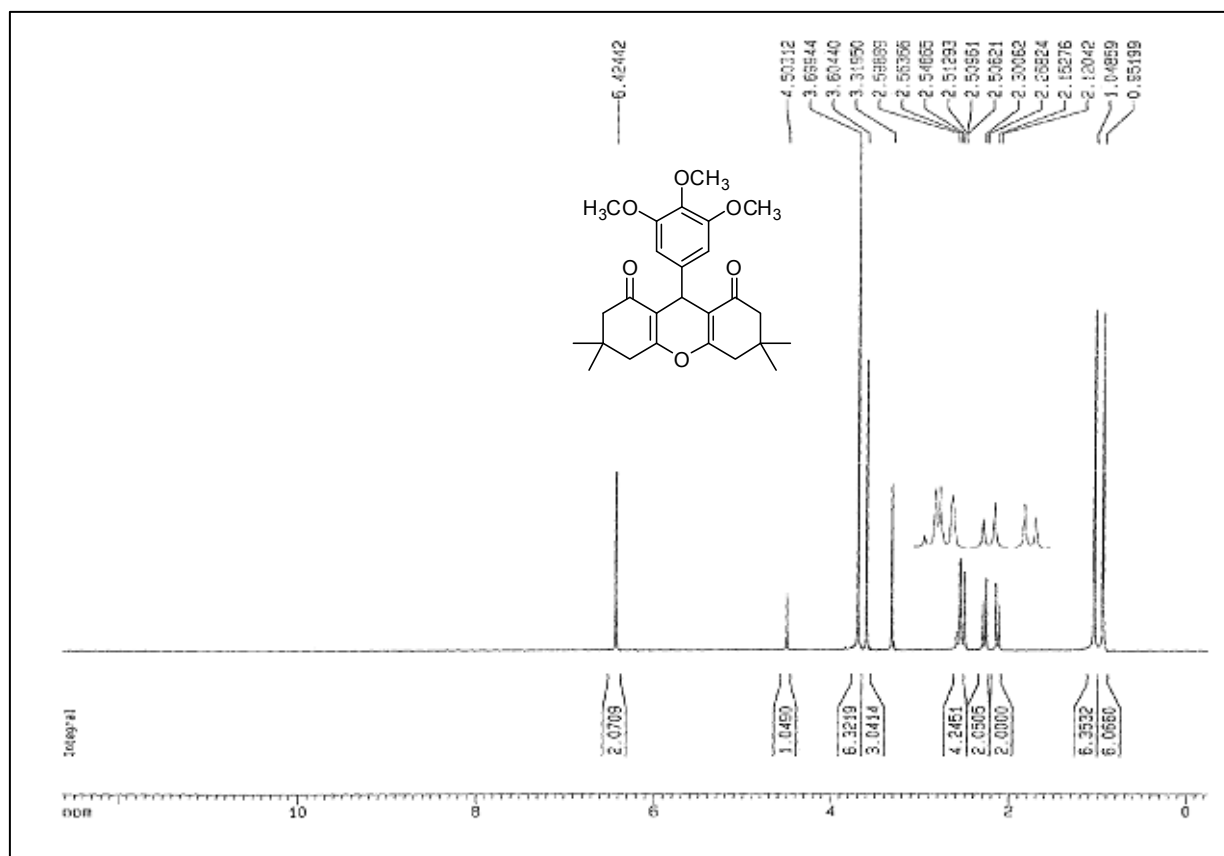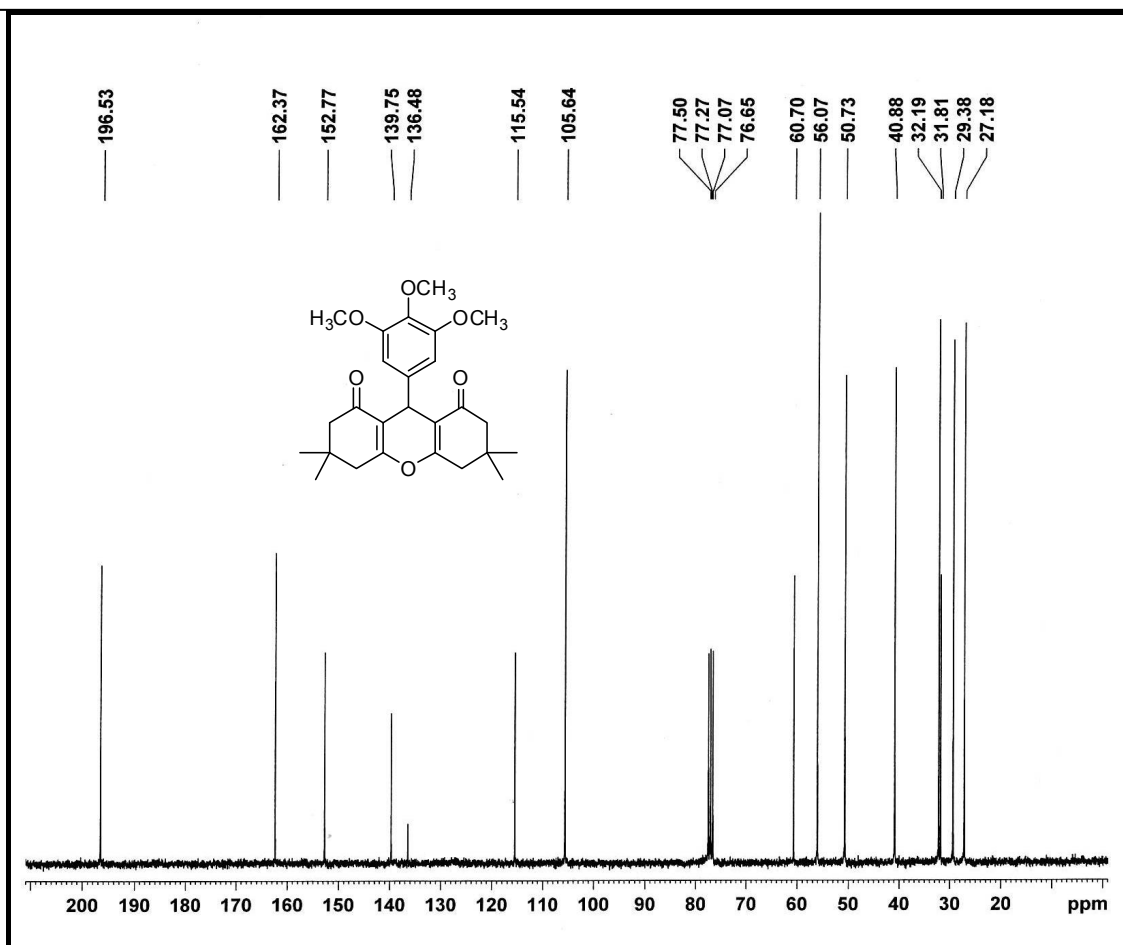

### 3,3,6,6-Tetramethyl-9-(4-methylphenyl)-1,8-dioxo-octahydroxanthene (1g)

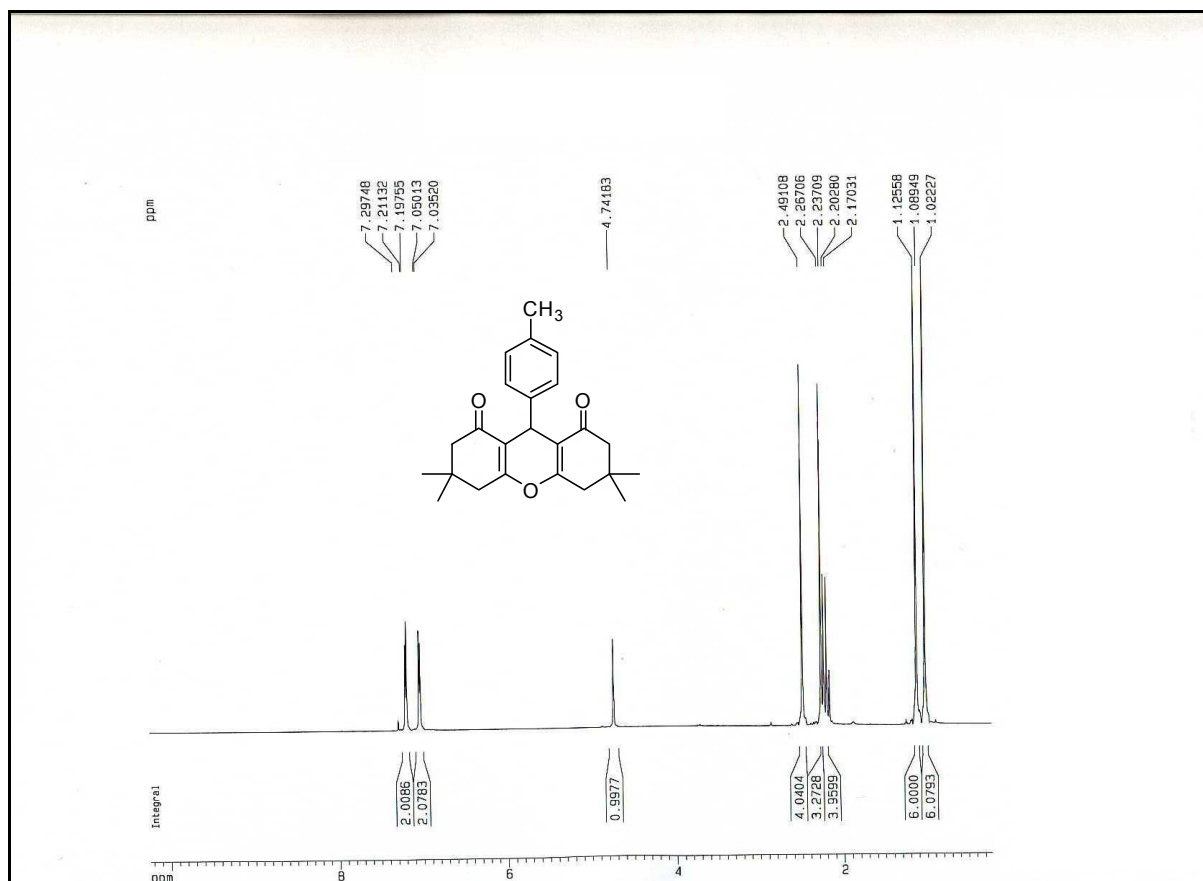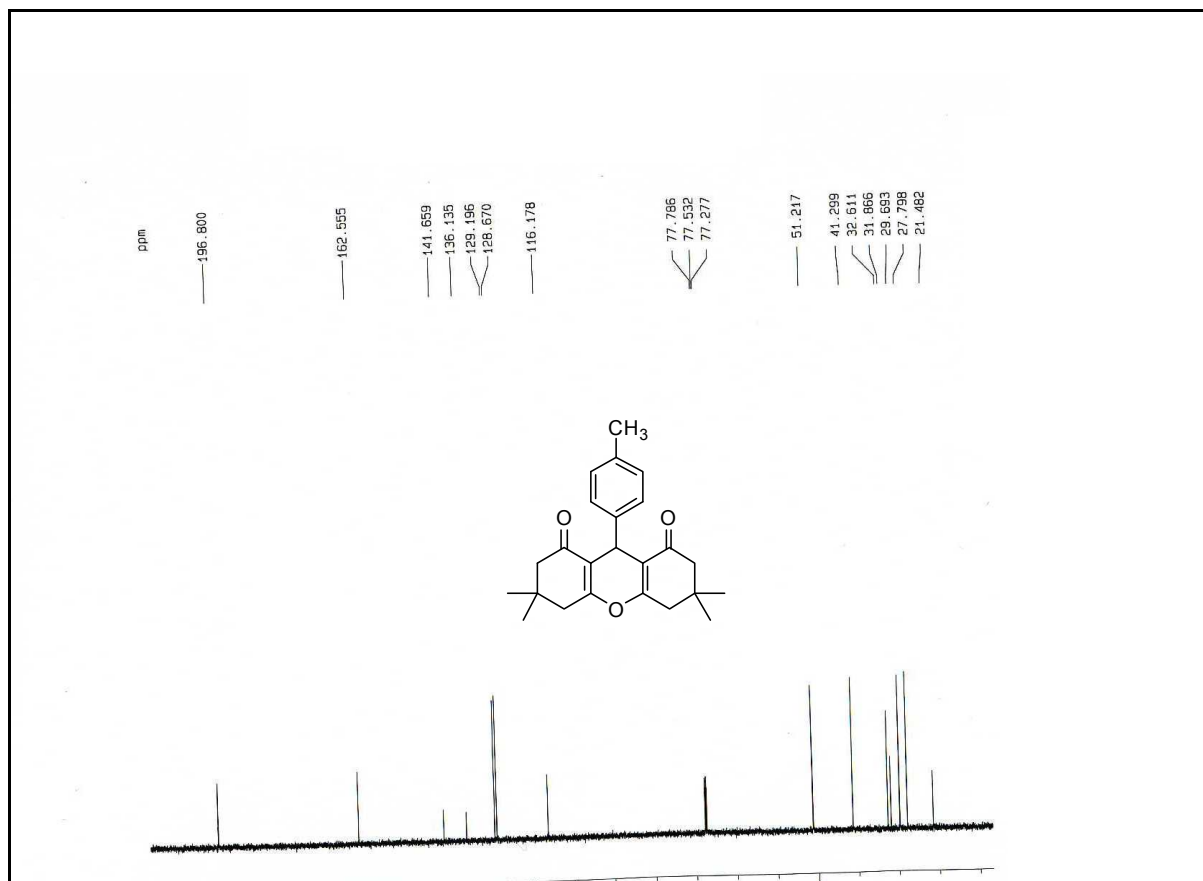

### 3,3,6,6-Tetramethyl-9-(4-hydroxyphenyl)-1,8-dioxo-octahydroxanthene (1h)

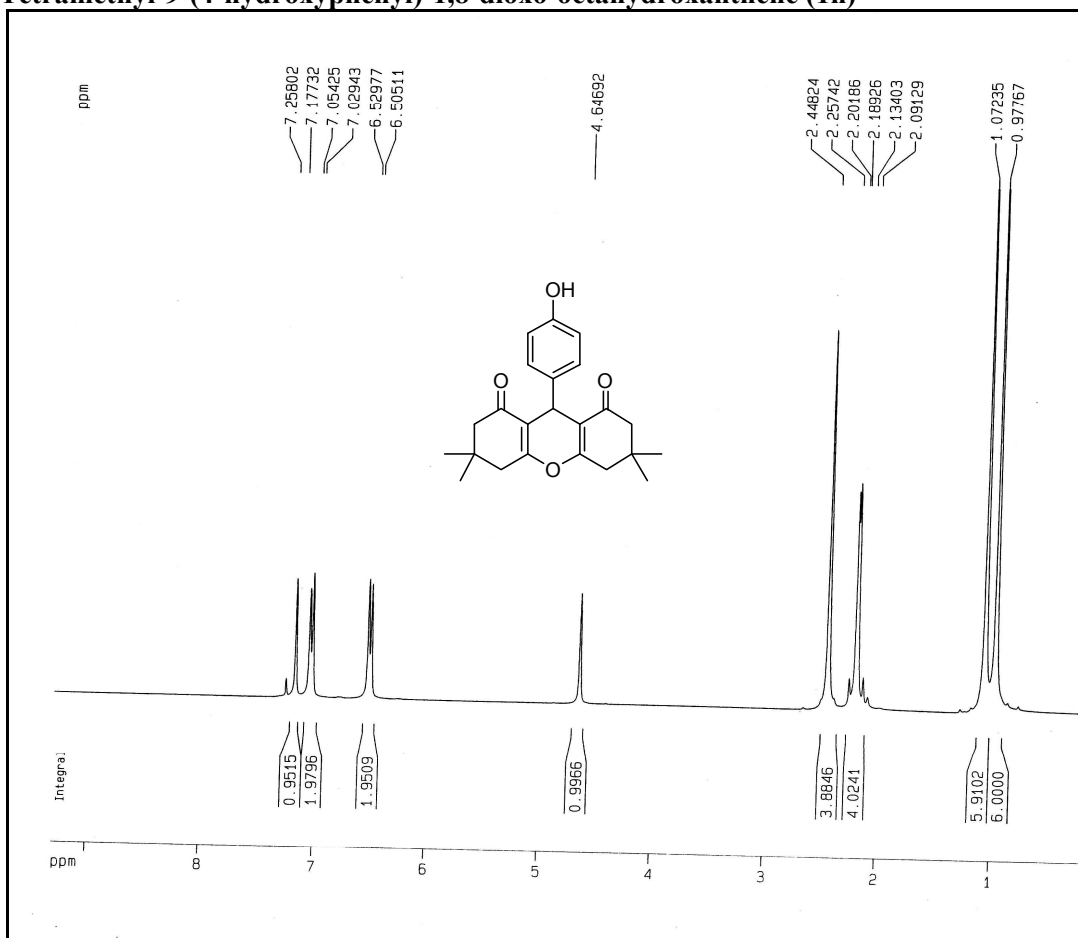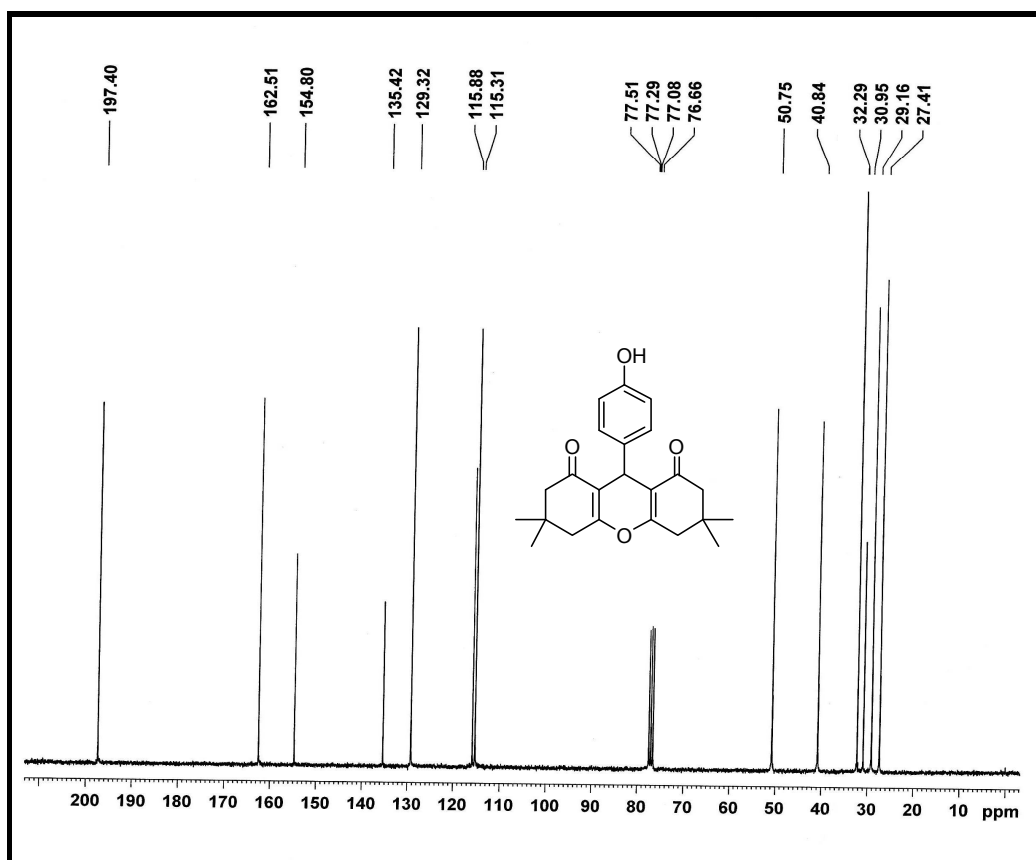

### 3,3,6,6-Tetramethyl-9-(5-bromo-2-hydroxyphenyl)-1,8-dioxo-octahydroxanthene (1i)

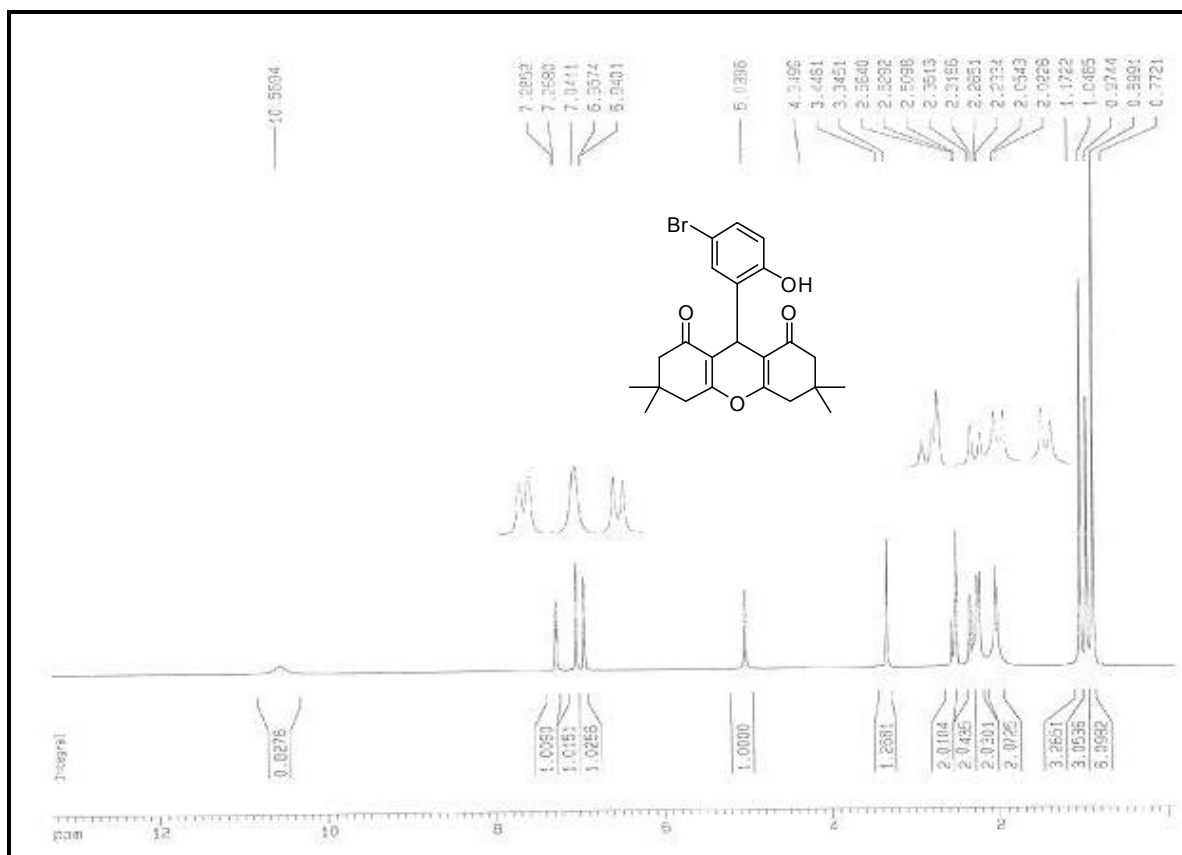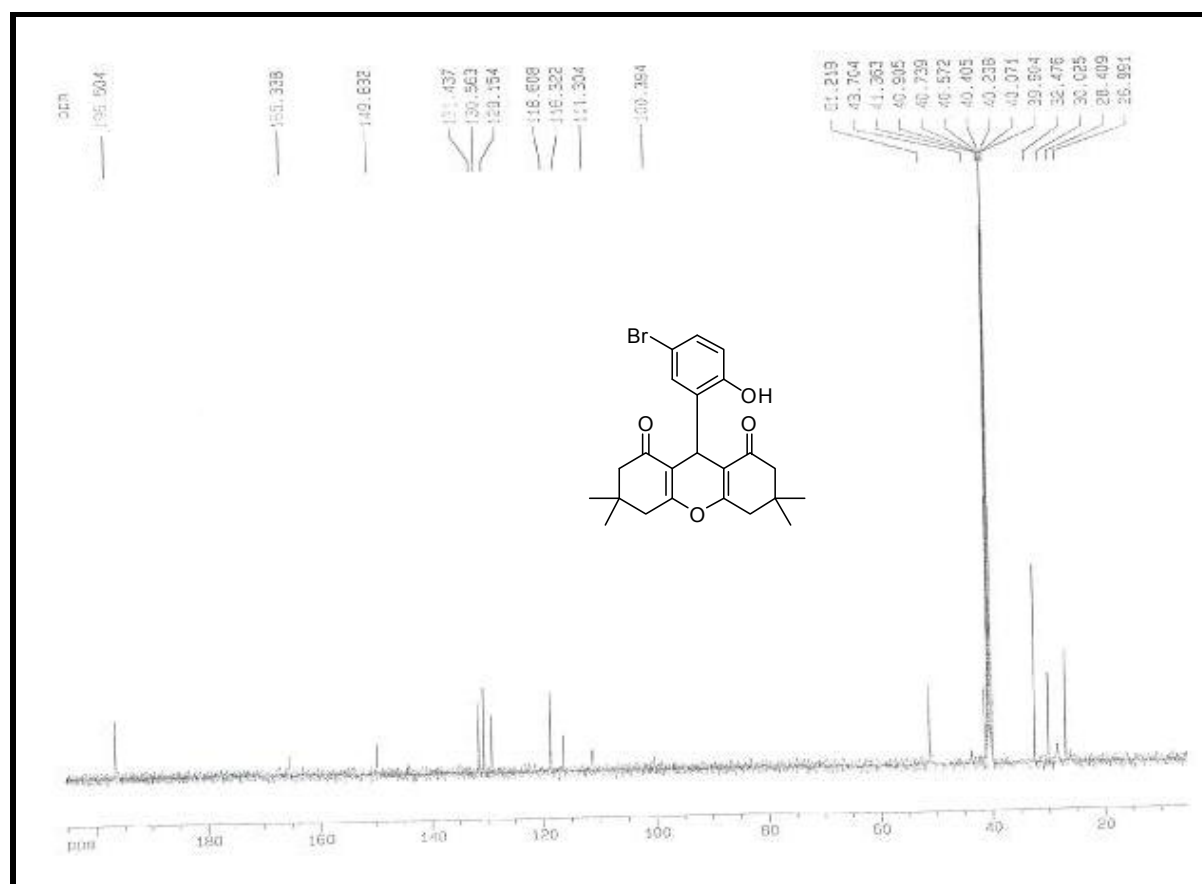

### 3,3,6,6-Tetramethyl-9-(4-bromophenyl)-1,8-dioxo-octahydroxanthene (1J)

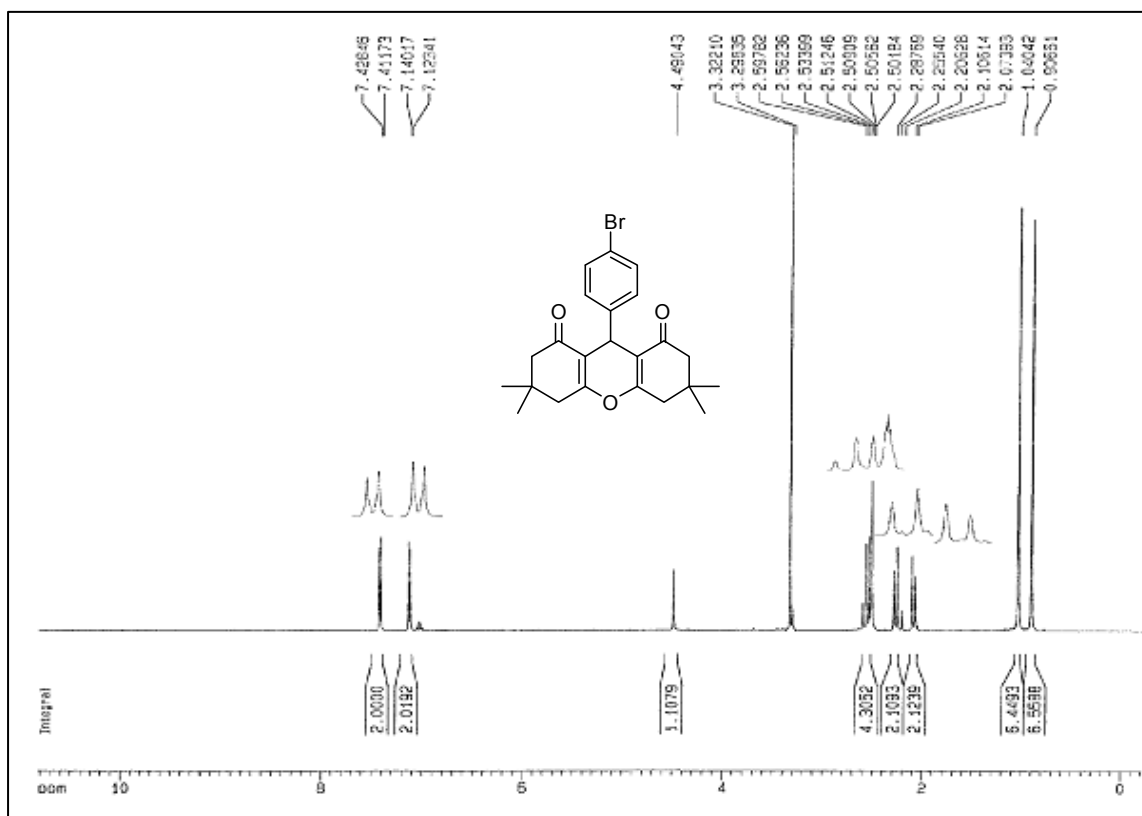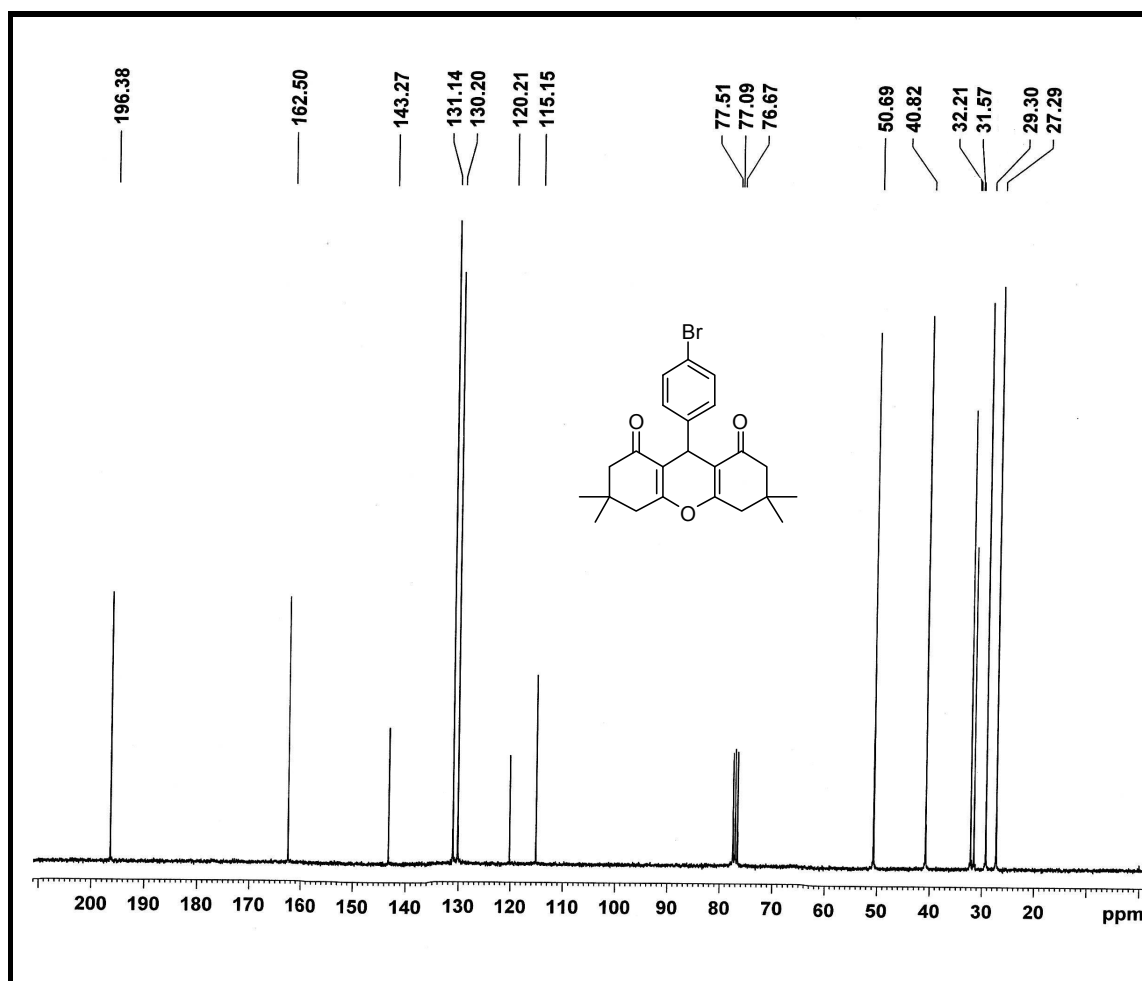

### 3,3,6,6-Tetramethyl-9-(4-chlorophenyl)-1,8-dioxo-octahydroxanthene (1k)

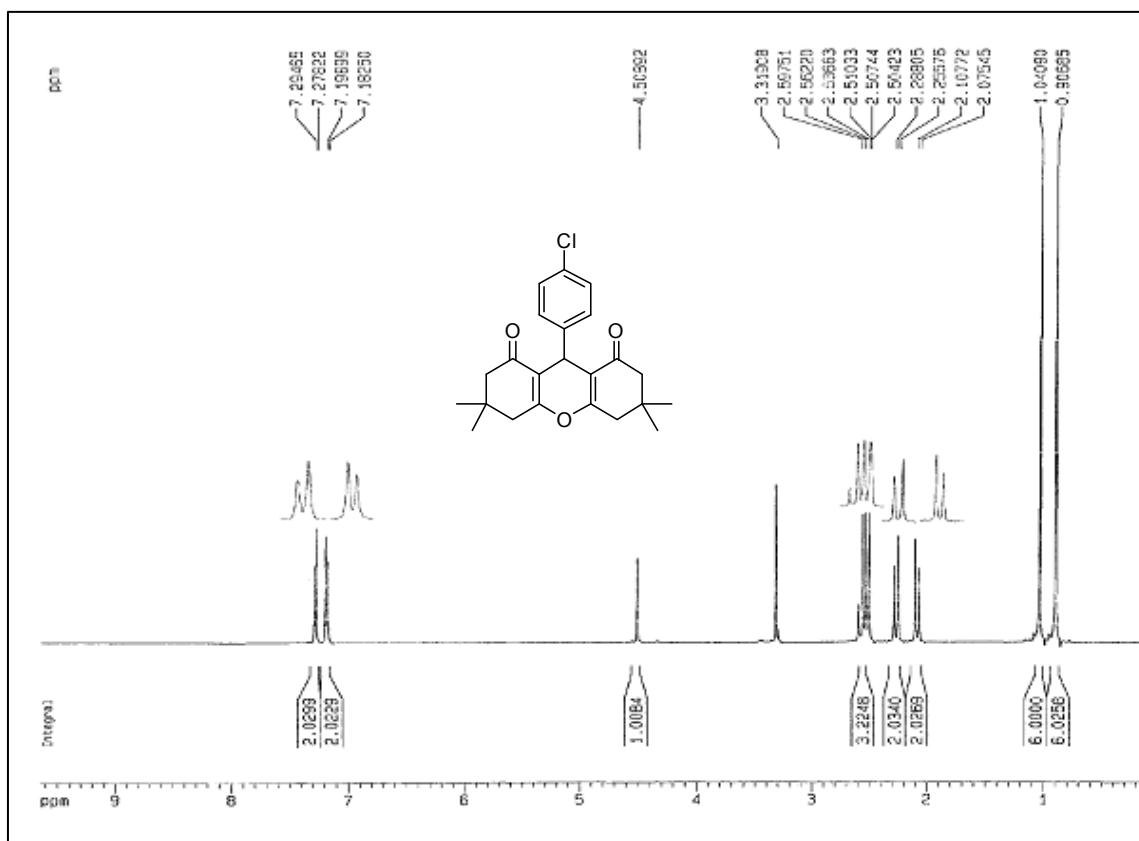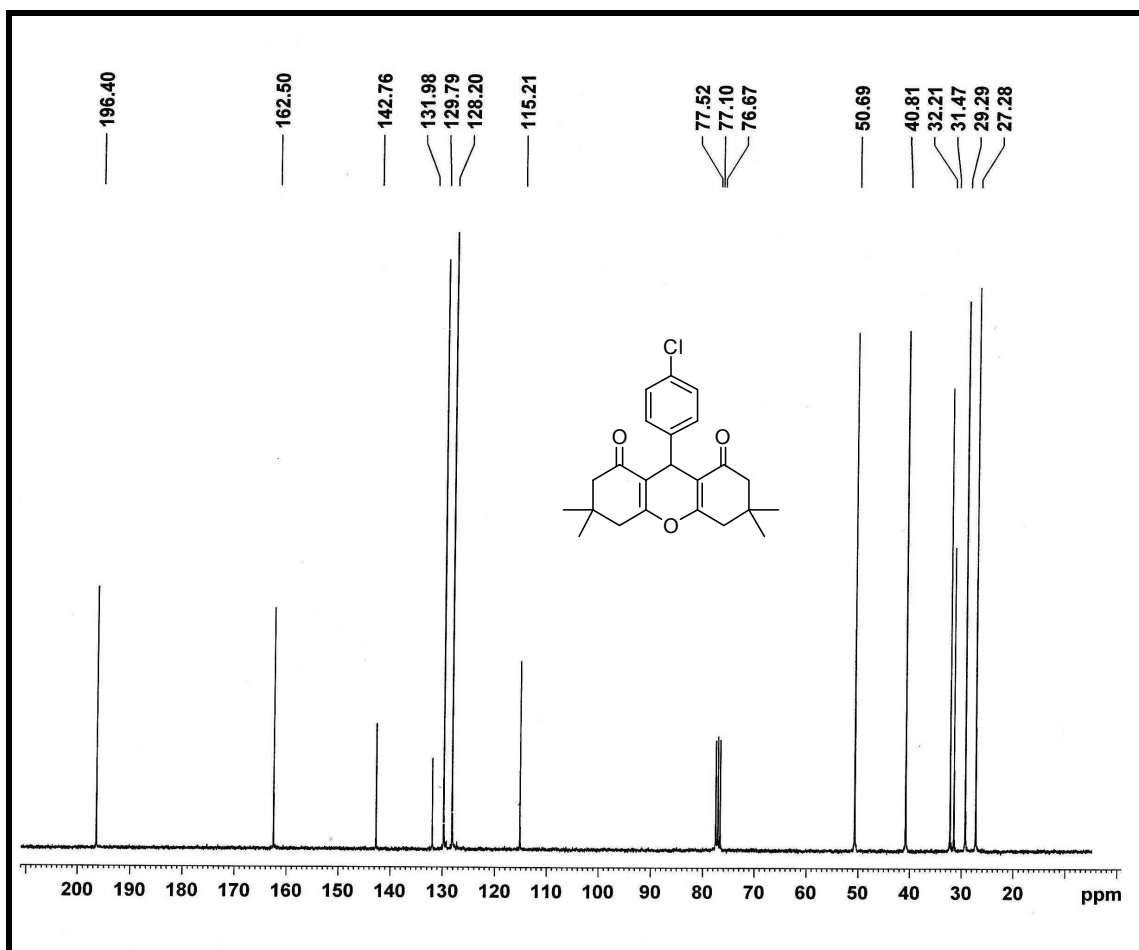



### 3,3,6,6-Tetramethyl-9-(3-chlorophenyl)-1,8-dioxo-octahydroxanthene (11)

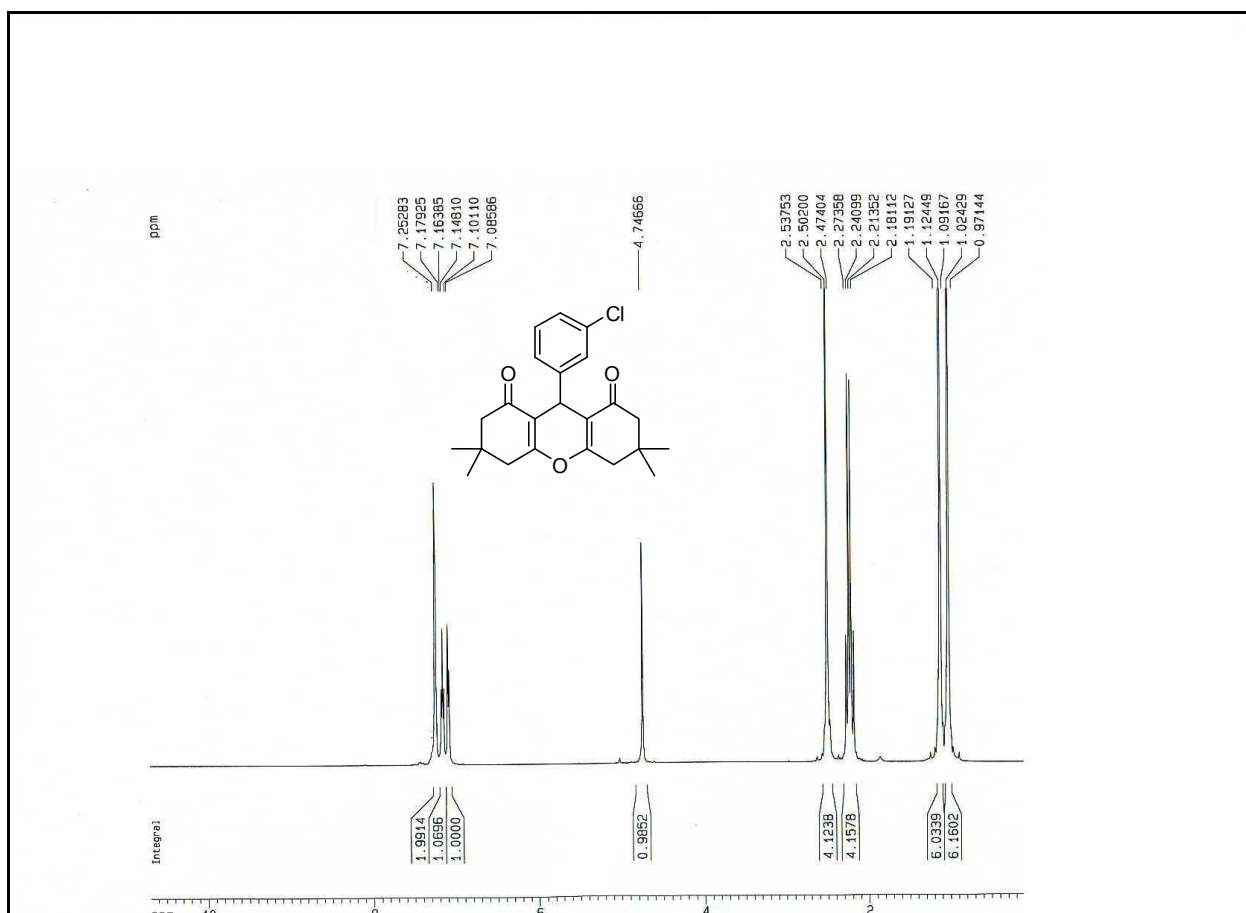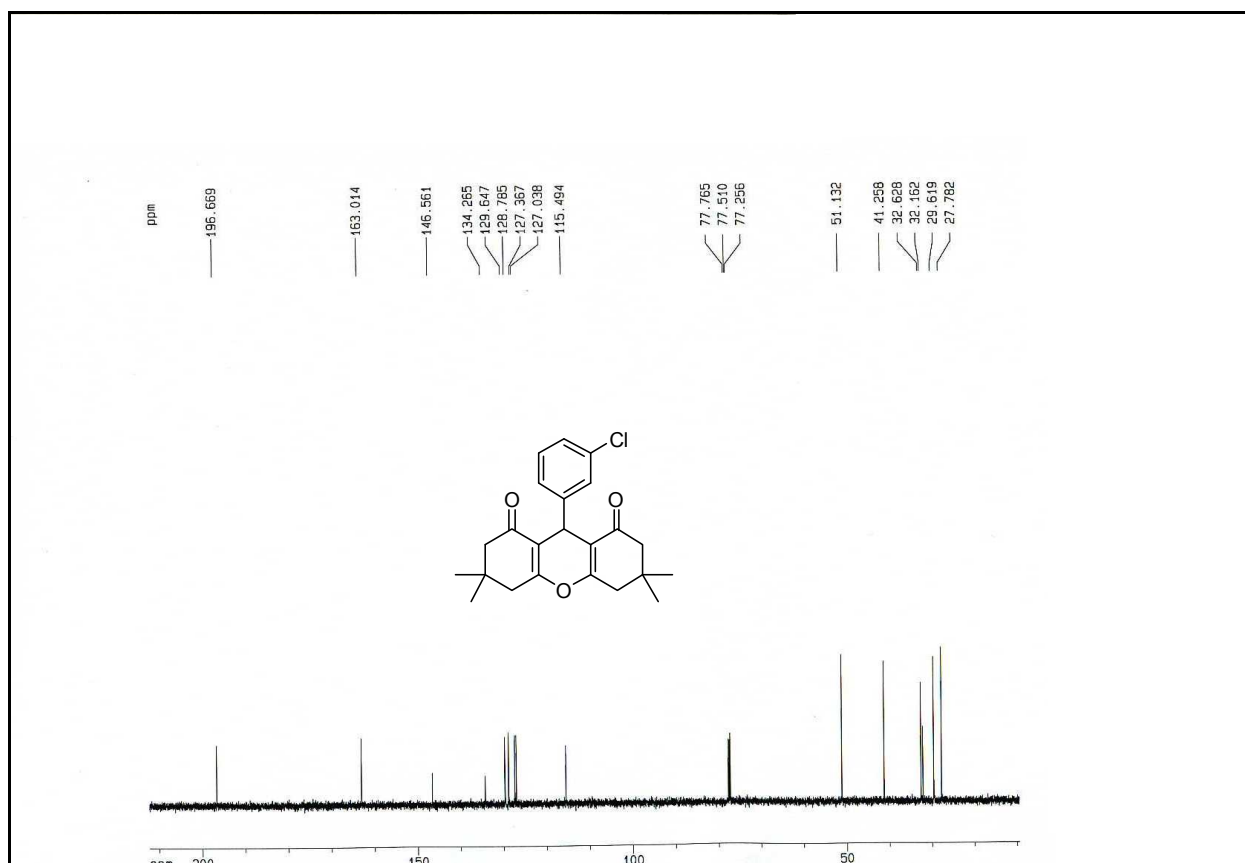

### 3,3,6,6-Tetramethyl-9-(2-chlorophenyl)-1,8-dioxo-octahydroxanthene (1m)

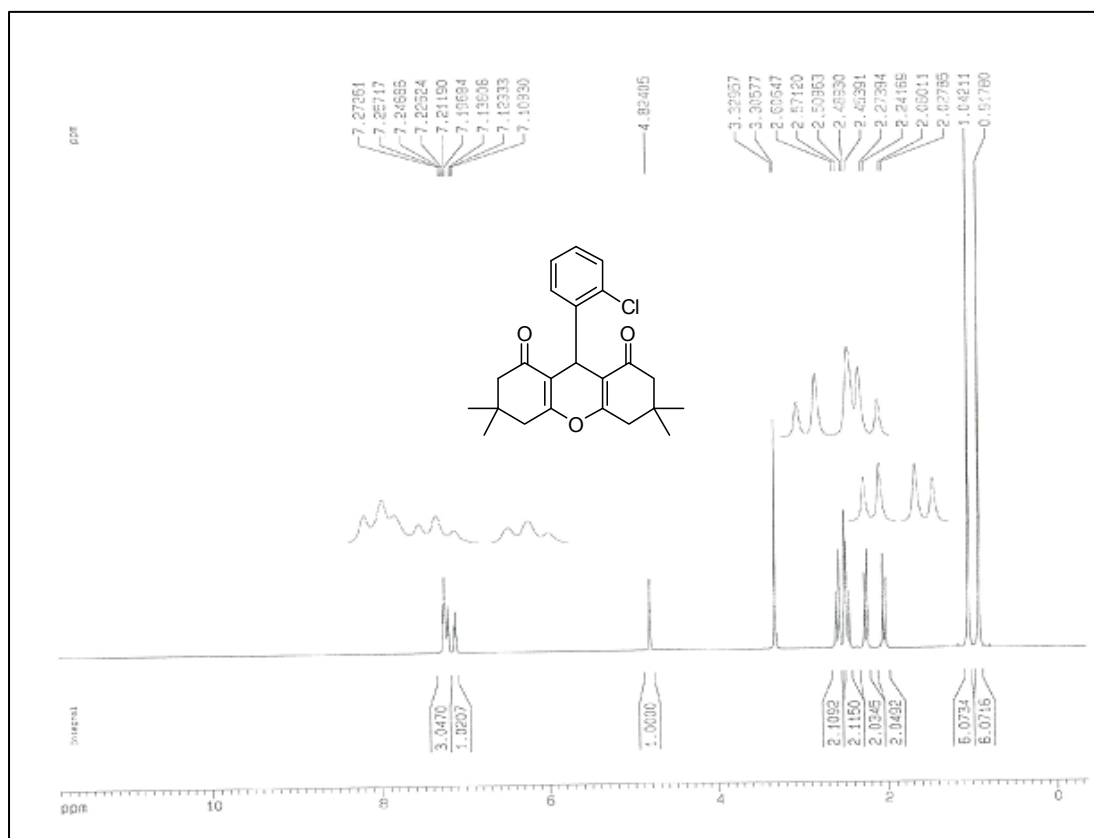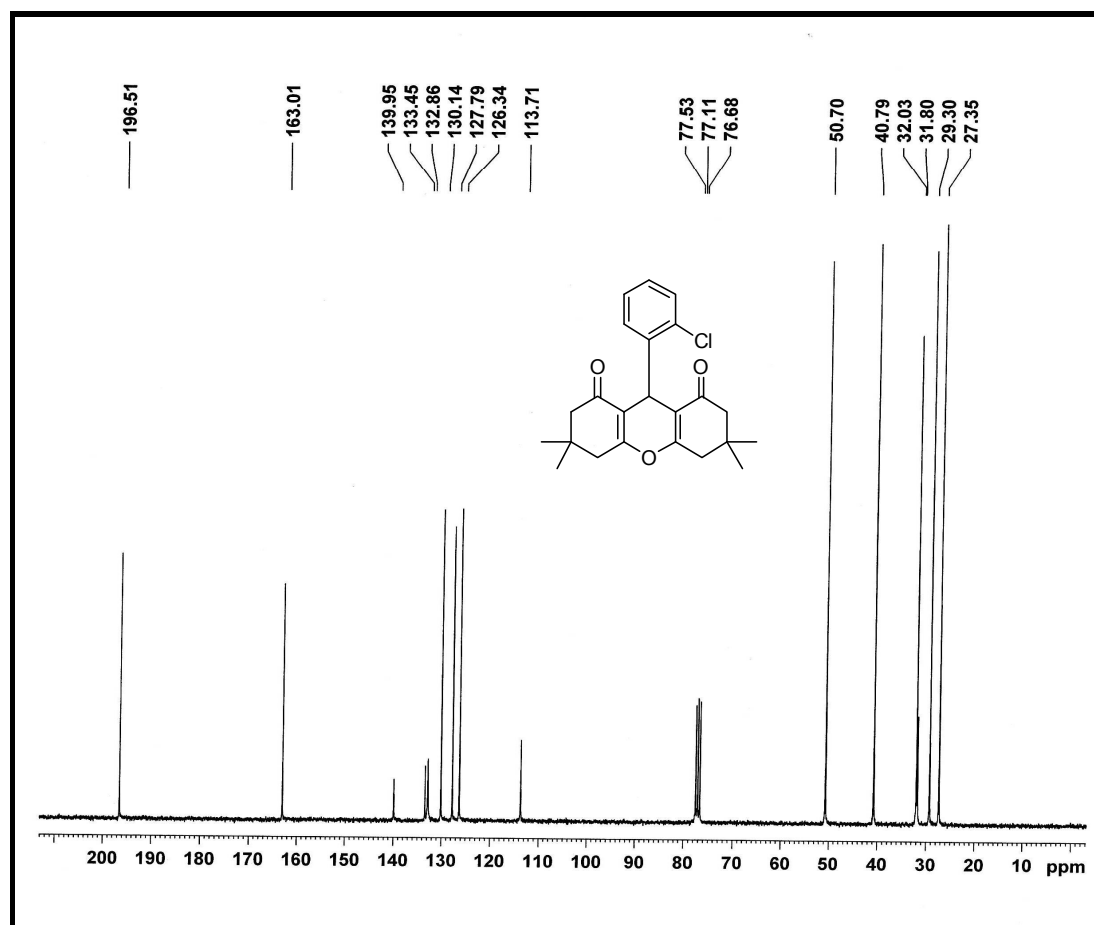

### 3,3,6,6-Tetramethyl-9-(4-nitrophenyl)-1,8-dioxo-octahydroxanthene (1n)

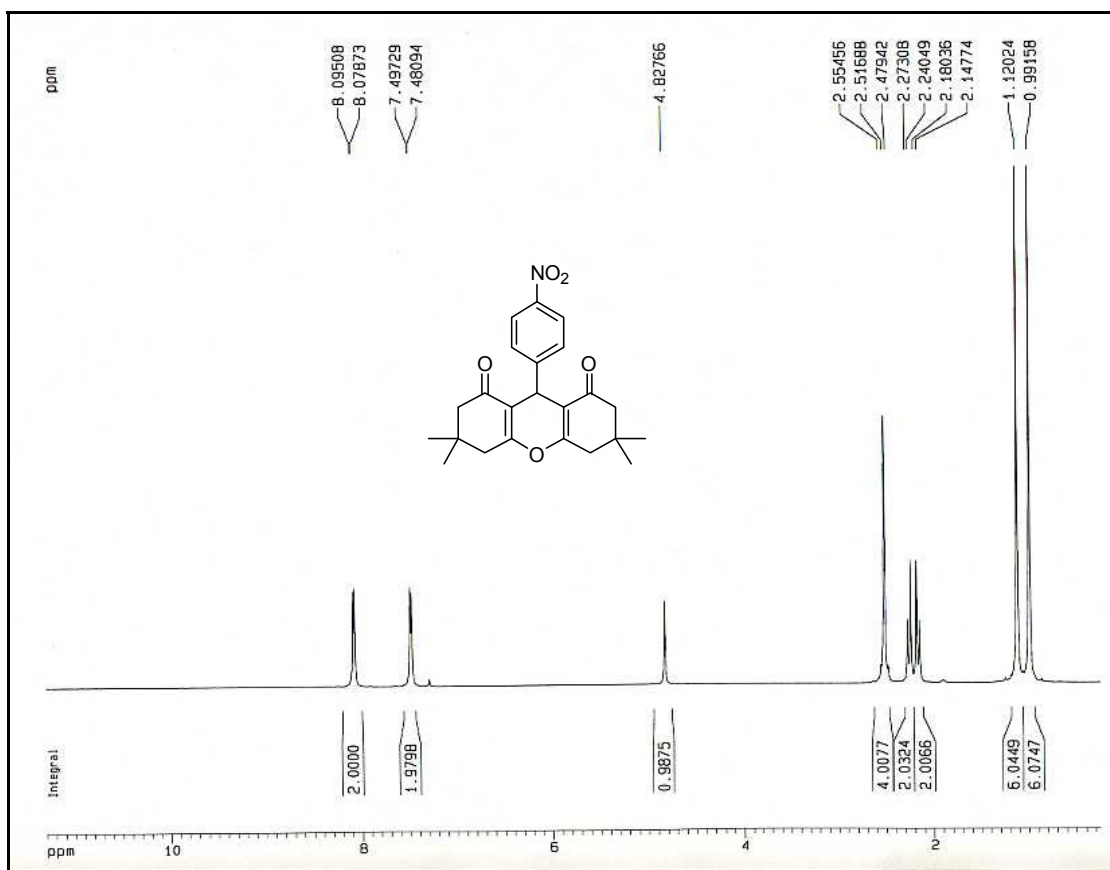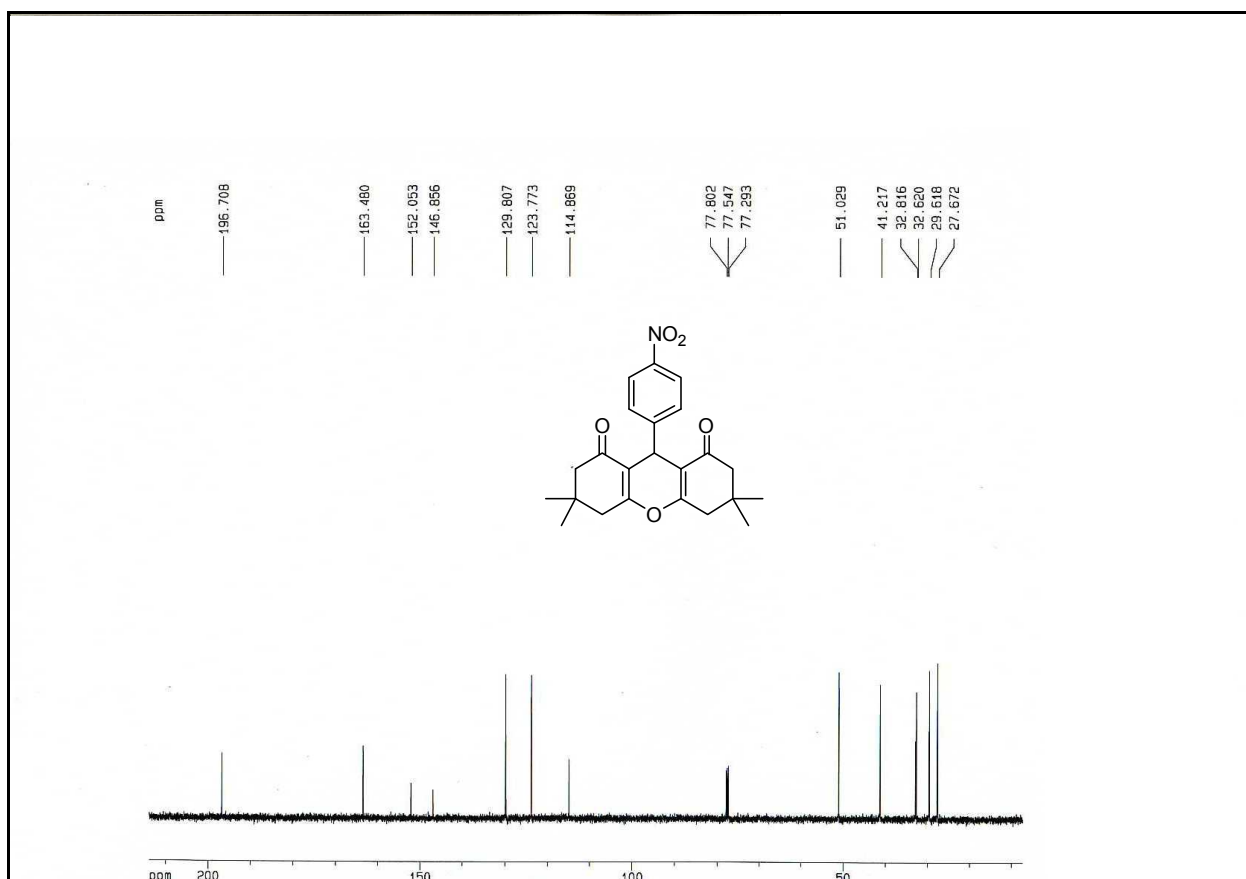

### 3,3,6,6-Tetramethyl-9-(3-nitrophenyl)-1,8-dioxo-octahydroxanthene (1o)

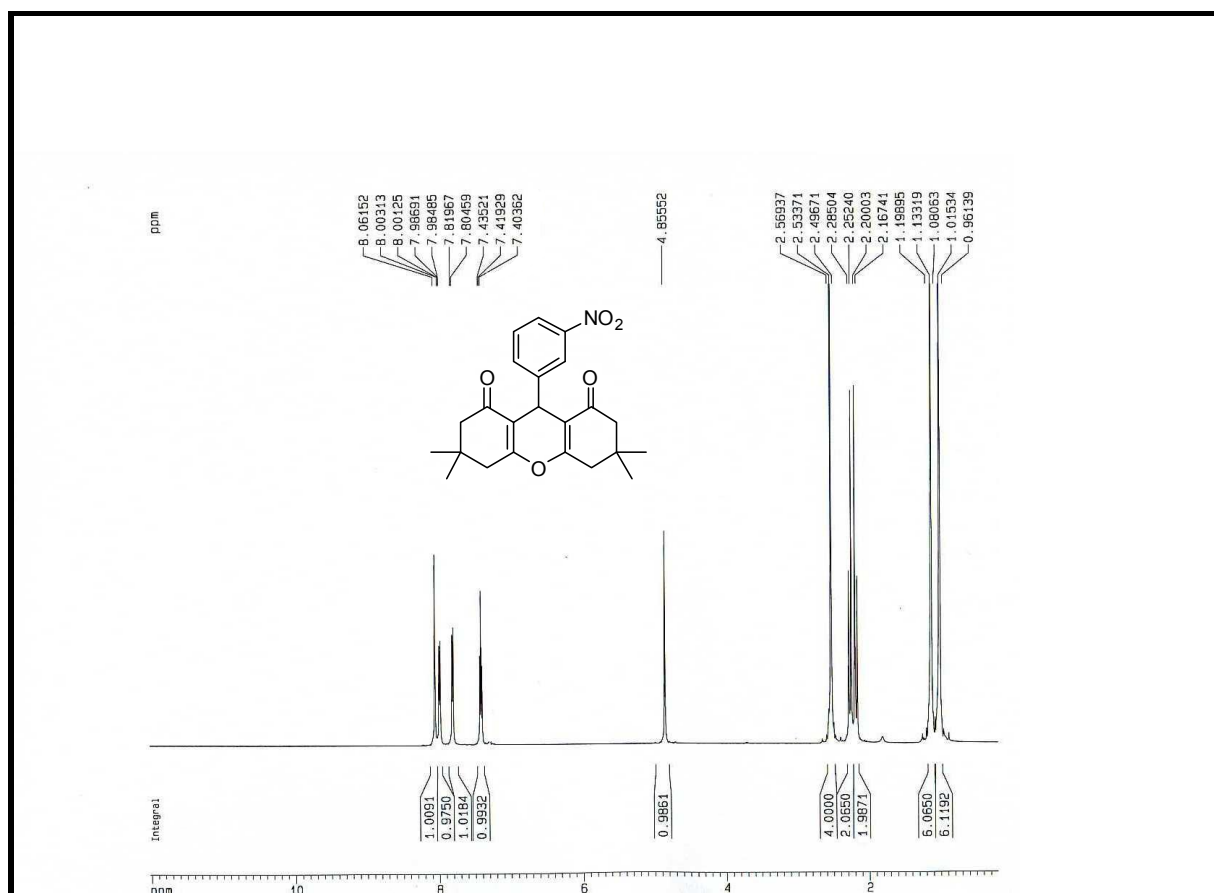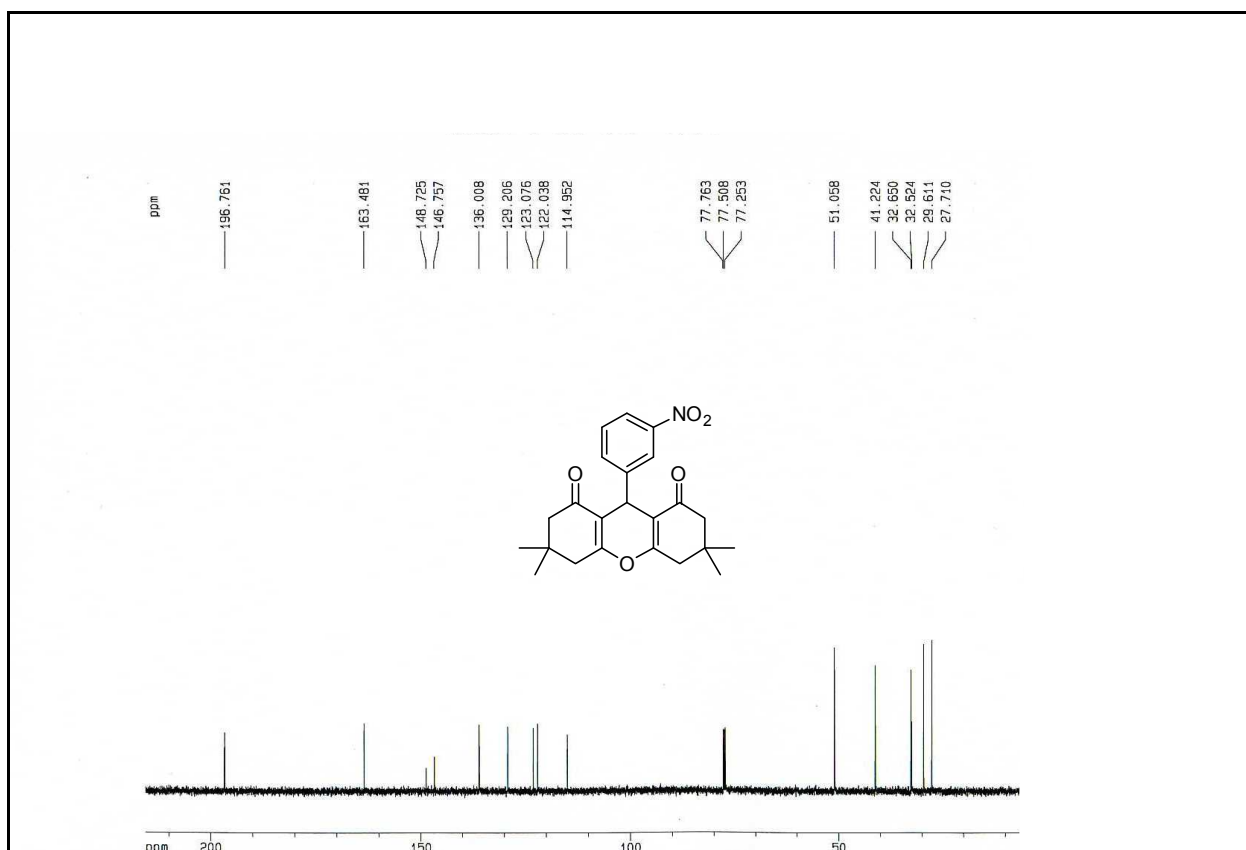

### 3,3,6,6-Tetramethyl-9-(4-cyanophenyl)-1,8-dioxo-octahydroxanthene (1p)

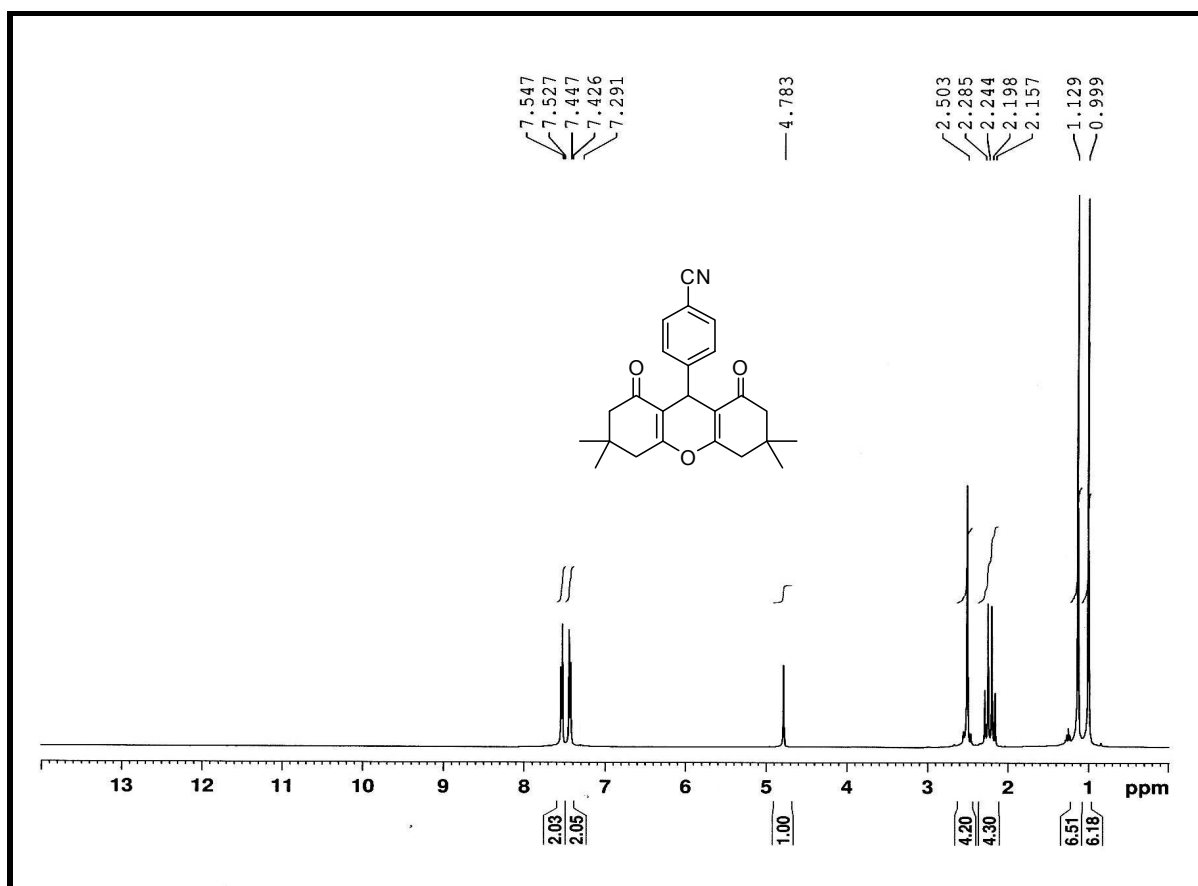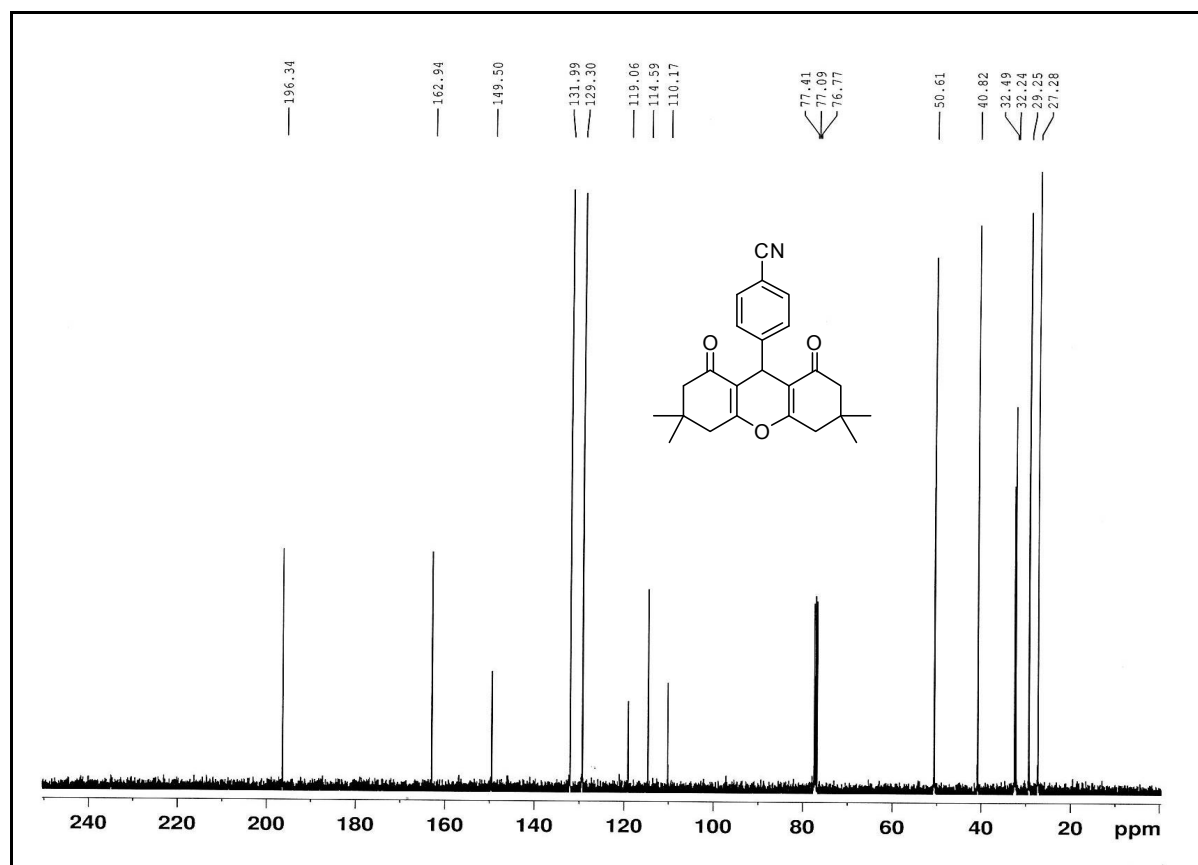

Supplement: c2ra22595f.pdf [file c2ra22595f.pdf]
